# Supplementary material for: Design, synthesis and biological evaluation of novel potent STAT3 inhibitors based on related heterocycle-fused naphthoquinones for cancer therapy
Source: Royal Society of Chemistry journal article supplement (doi:10.1039/d2nj05206g), 2022-11-28
Supplement: d2nj05206g1.pdf [file d2nj05206g1.pdf]

Design, synthesis and biological evaluation of novel potent STAT3 inhibitors based  
on related heterocycle-fused naphthoquinones for cancer therapy

Yuanguang Chen,<sup>a†</sup> Huashen Xu,<sup>a†</sup>, Lu Chen,<sup>a</sup> Maoying Zhang,<sup>a</sup> Dexiao, Yang<sup>c</sup> Minghui  
Tong,<sup>c</sup> Xuan Shi,<sup>c</sup> Zhongbo Liu<sup>b\*</sup> \* Guoliang Chen<sup>a\*</sup>

<sup>a</sup>Key Laboratory of Structure-Based Drug Design & Discovery of Ministry of Education,  
School of Pharmaceutical Engineering, Shenyang Pharmaceutical University, Shenyang 110016,  
China

<sup>b</sup>School of Pharmacy, Shenyang Pharmaceutical University, Shenyang 110016, China

<sup>c</sup>3D BioOptima Co., Ltd., Suzhou 215104, PR China

<sup>†</sup>These authors contributed equally to this work

**Figure S1.** Antiproliferative Activities of **A1-A21** against HepG2, K562 cell and L-02  
cell lines .....2  
**Figure S2.** <sup>1</sup>H NMR, <sup>13</sup>C NMR, HRMS and HPLC Spectrum of  
Compounds.....3

**Figure S1.** Antiproliferative Activities of A1-A21 against HepG2 (A), K562 (B) cell lines and L-02 (c) cell lines

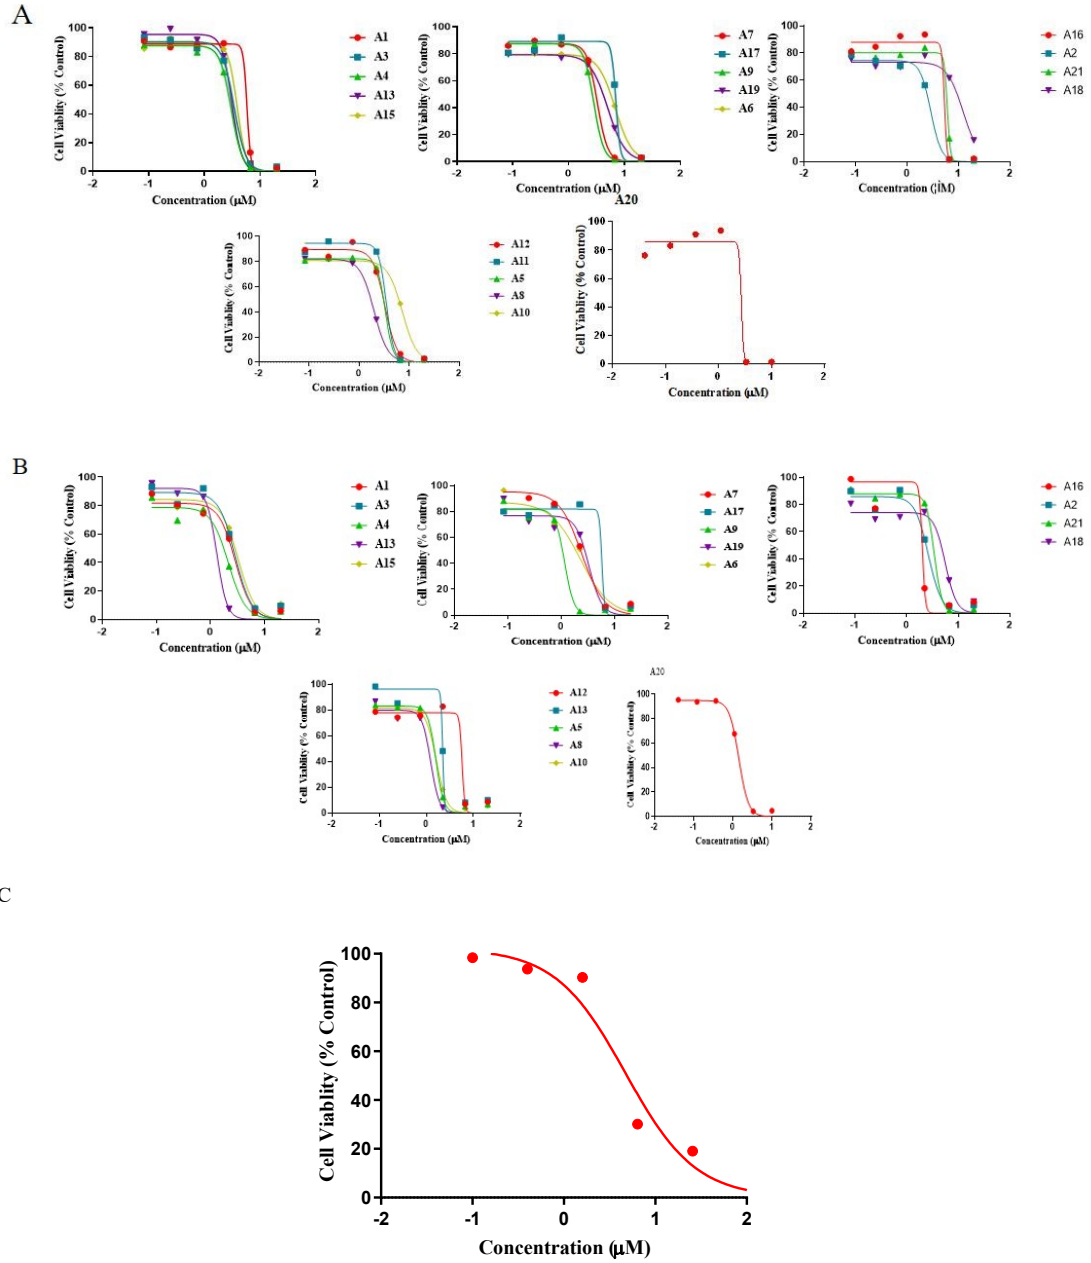

Figure S2.  $^1\text{H}$  NMR,  $^{13}\text{C}$  NMR, HRMS and HPLC Spectrum of Compounds

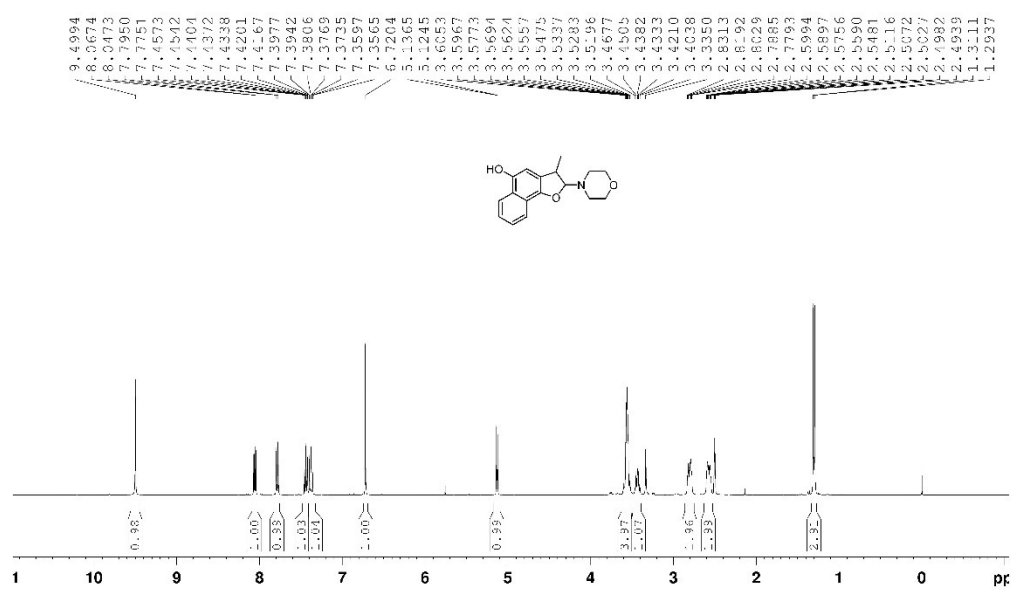

$^1\text{H}$  NMR spectrum of 2

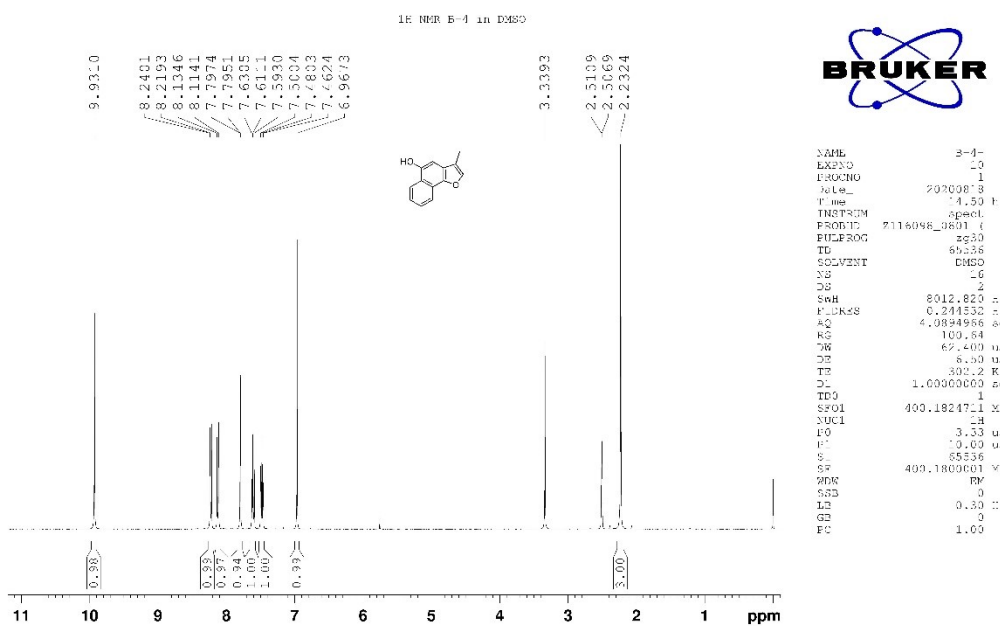

<sup>1</sup>H NMR spectrum of 3

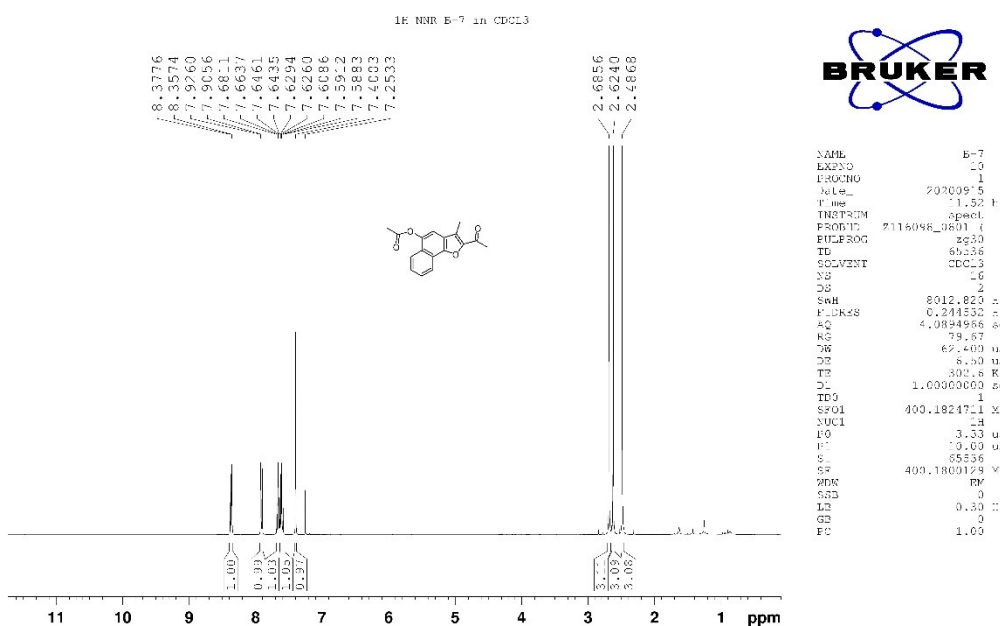

<sup>1</sup>H NMR spectrum of 4



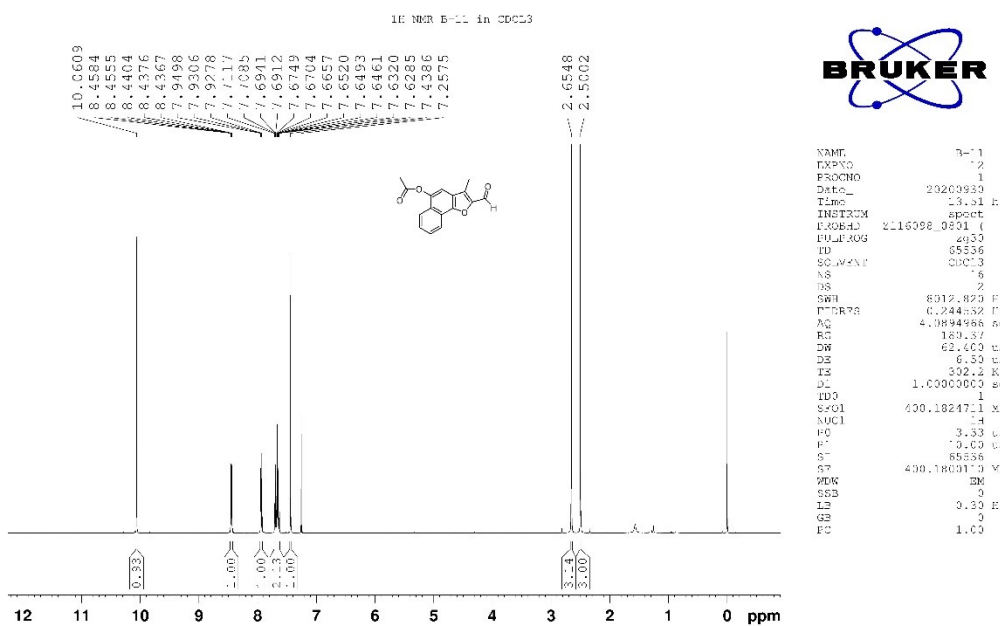

<sup>1</sup>H NMR spectrum of 5

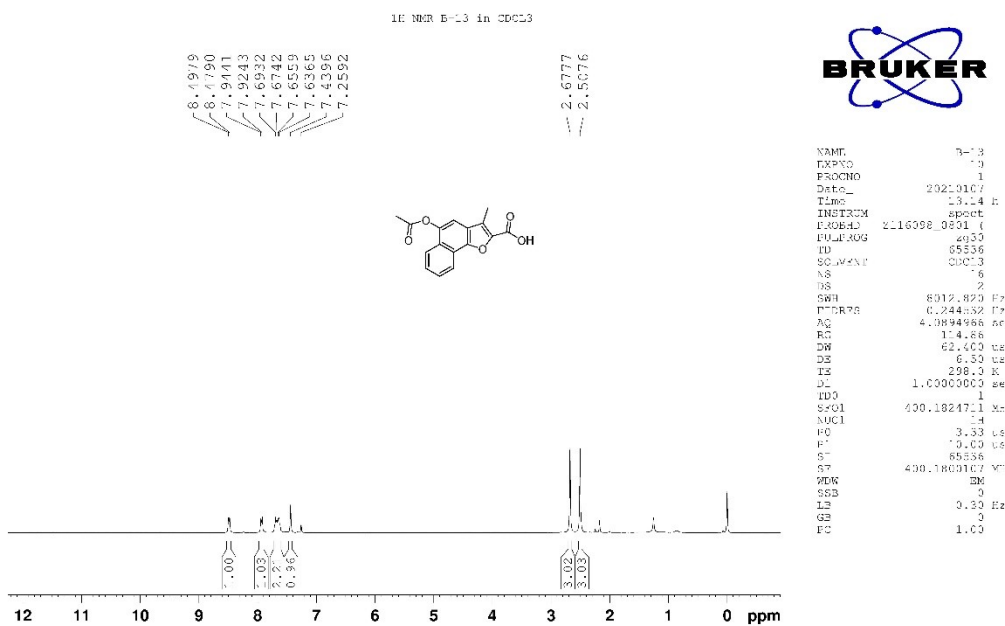

<sup>1</sup>H NMR spectrum of 6

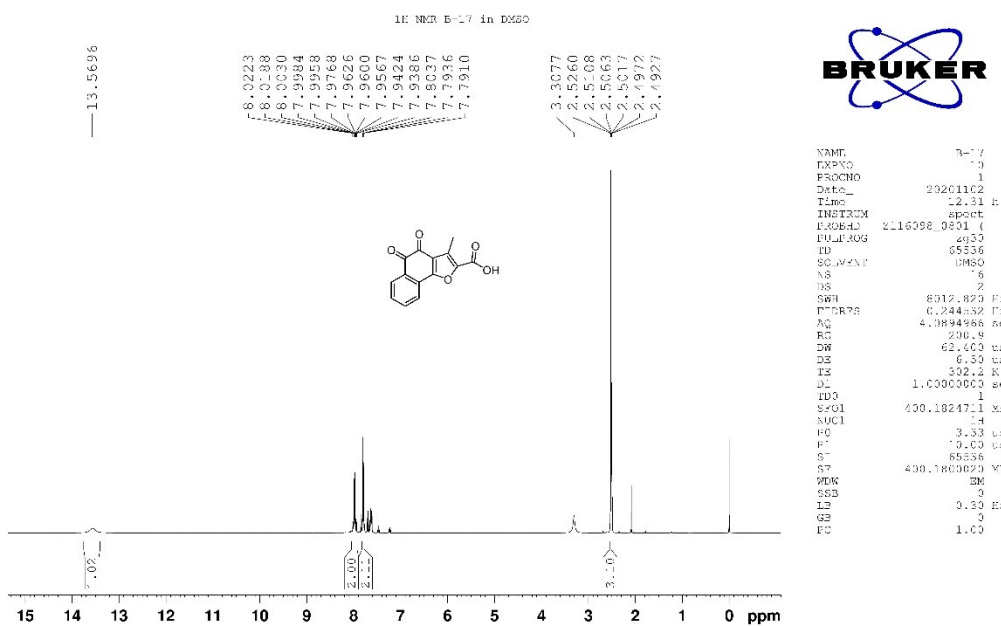

<sup>1</sup>H NMR spectrum of 1

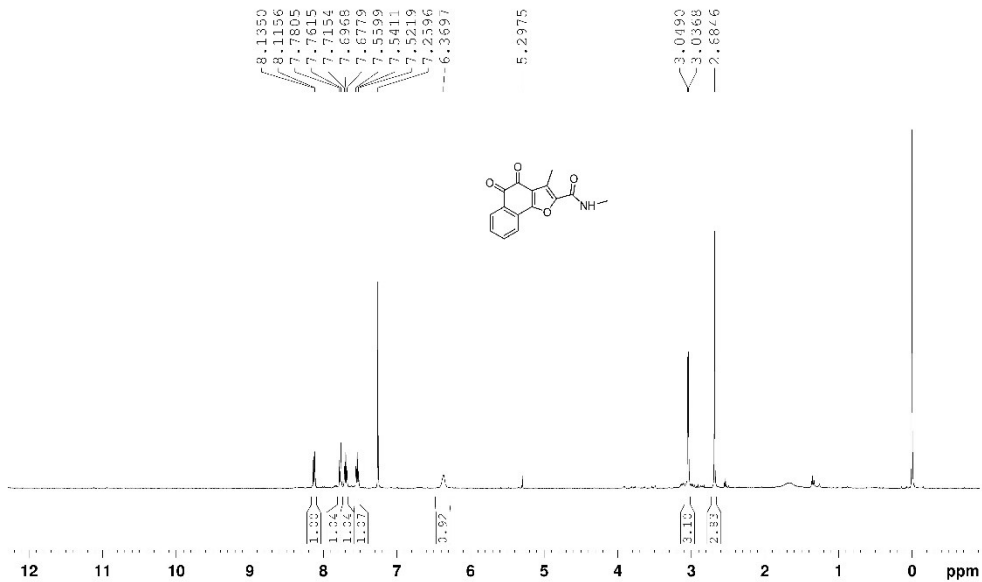

<sup>1</sup>H NMR spectrum of A1



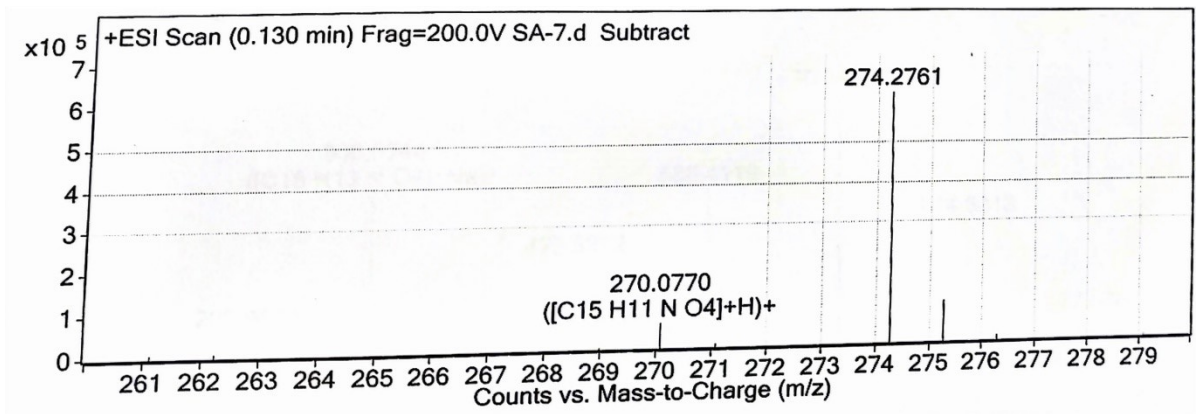

### HRMS analysis of A1

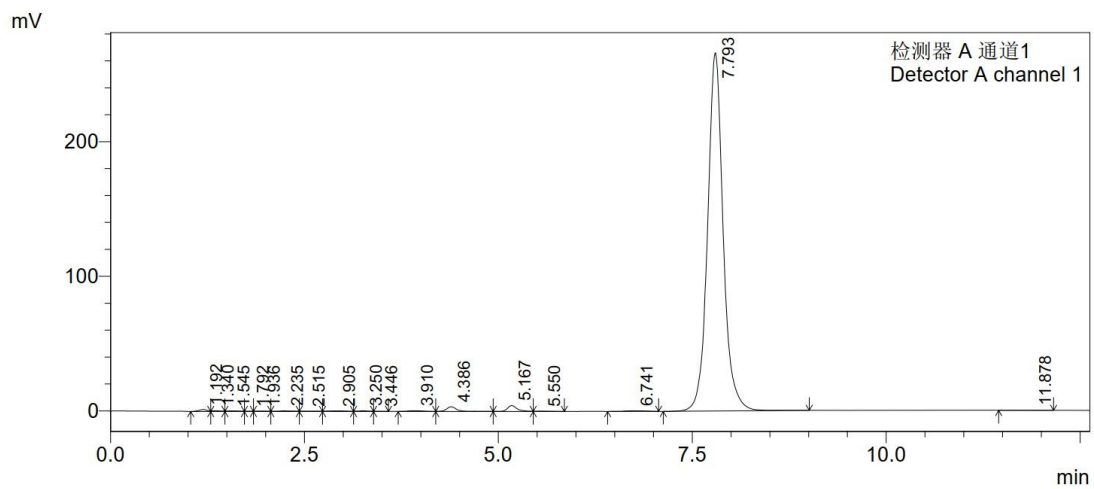

| peak  | time (min) | Area    | height | Aera %  | height % |
|-------|------------|---------|--------|---------|----------|
| 1     | 1.192      | 11272   | 1495   | 0.292   | 0.532    |
| 2     | 1.340      | 5024    | 596    | 0.130   | 0.212    |
| 3     | 1.545      | 5512    | 464    | 0.143   | 0.165    |
| 4     | 1.792      | 1836    | 267    | 0.048   | 0.095    |
| 5     | 1.936      | 3717    | 310    | 0.096   | 0.110    |
| 6     | 2.235      | 6611    | 485    | 0.171   | 0.172    |
| 7     | 2.515      | 3890    | 289    | 0.101   | 0.103    |
| 8     | 2.905      | 7043    | 405    | 0.183   | 0.144    |
| 9     | 3.250      | 4988    | 565    | 0.129   | 0.201    |
| 10    | 3.446      | 1626    | 170    | 0.042   | 0.060    |
| 11    | 3.910      | 8403    | 734    | 0.218   | 0.261    |
| 12    | 4.386      | 32577   | 3544   | 0.844   | 1.261    |
| 13    | 5.167      | 38162   | 4378   | 0.989   | 1.558    |
| 14    | 5.550      | 3391    | 256    | 0.088   | 0.091    |
| 15    | 6.741      | 7838    | 602    | 0.203   | 0.214    |
| 16    | 7.793      | 3712358 | 266243 | 96.235  | 94.755   |
| 17    | 11.878     | 3368    | 178    | 0.087   | 0.063    |
| total |            | 3857614 | 280981 | 100.000 | 100.000  |

### HPLC analysis of A1

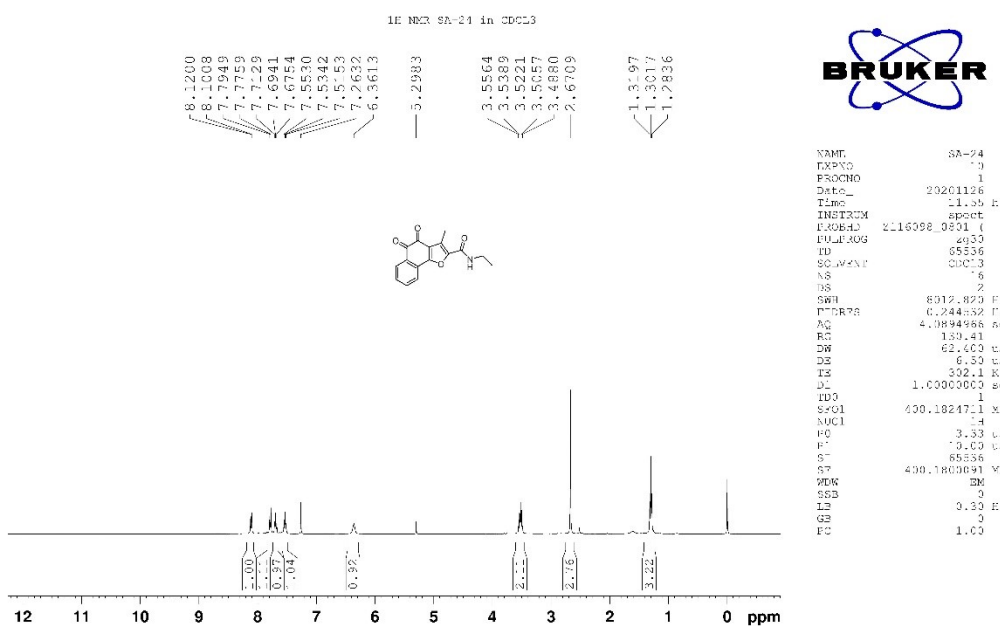

### <sup>1</sup>H NMR spectrum of A2

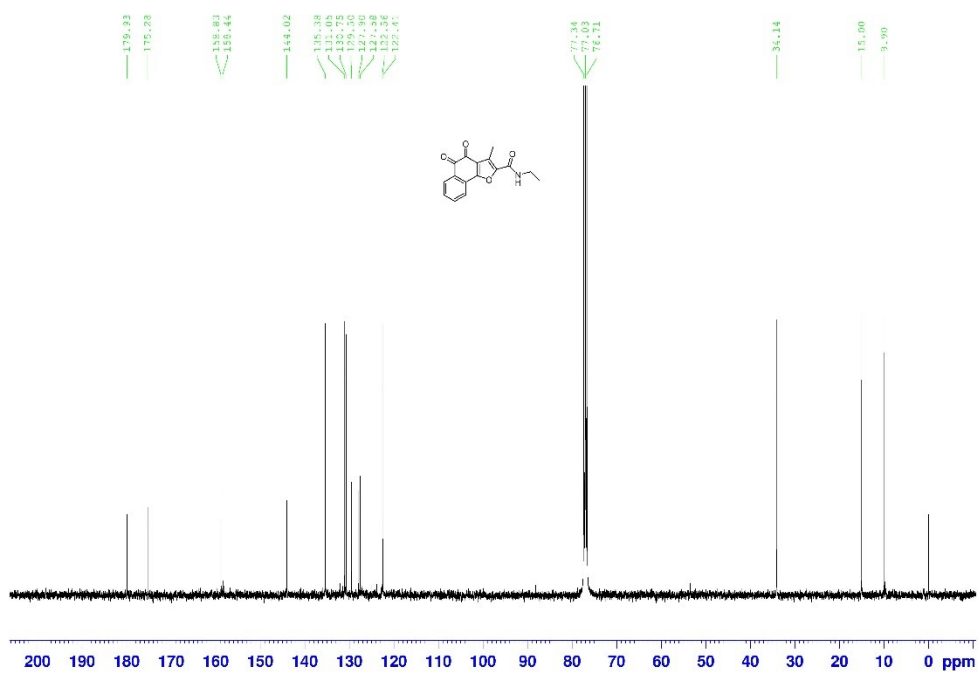

$^{13}\text{C}$  NMR spectrum of A2

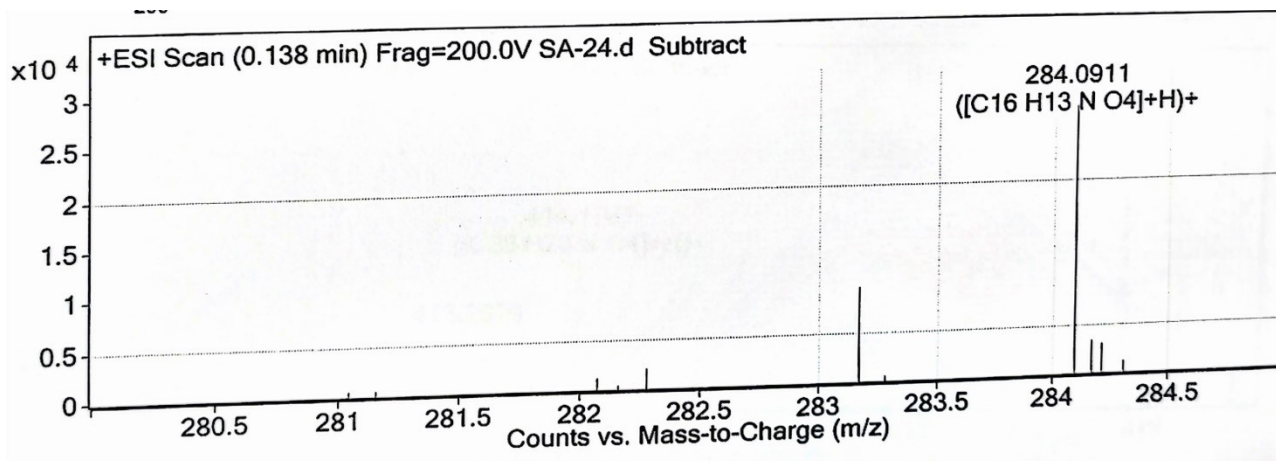

### HRMS analysis of A2

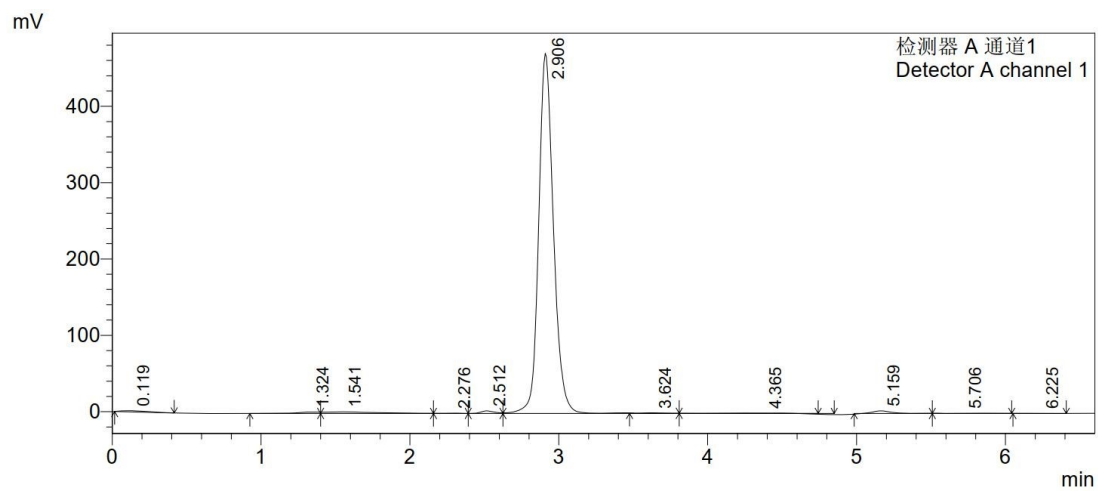

| peak  | time (min) | Area   | height | Area %  | height % |
|-------|------------|--------|--------|---------|----------|
| 1     | 0.110      | 1588   | 128    | 0.542   | 0.309    |
| 2     | 1.302      | 2026   | 189    | 0.692   | 0.456    |
| 3     | 2.512      | 1695   | 275    | 0.579   | 0.662    |
| 4     | 2.906      | 286227 | 40837  | 97.782  | 98.301   |
| 5     | 3.590      | 1183   | 113    | 0.404   | 0.273    |
| total |            | 292719 | 41543  | 100.000 | 100.000  |

### HPLC analysis of A2

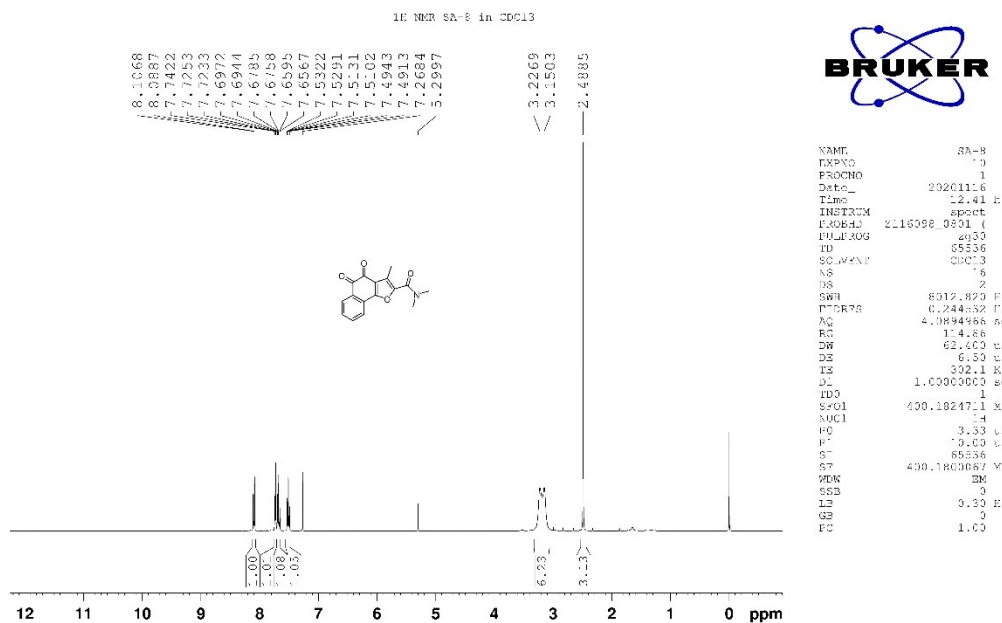

### <sup>1</sup>H NMR spectrum of A3



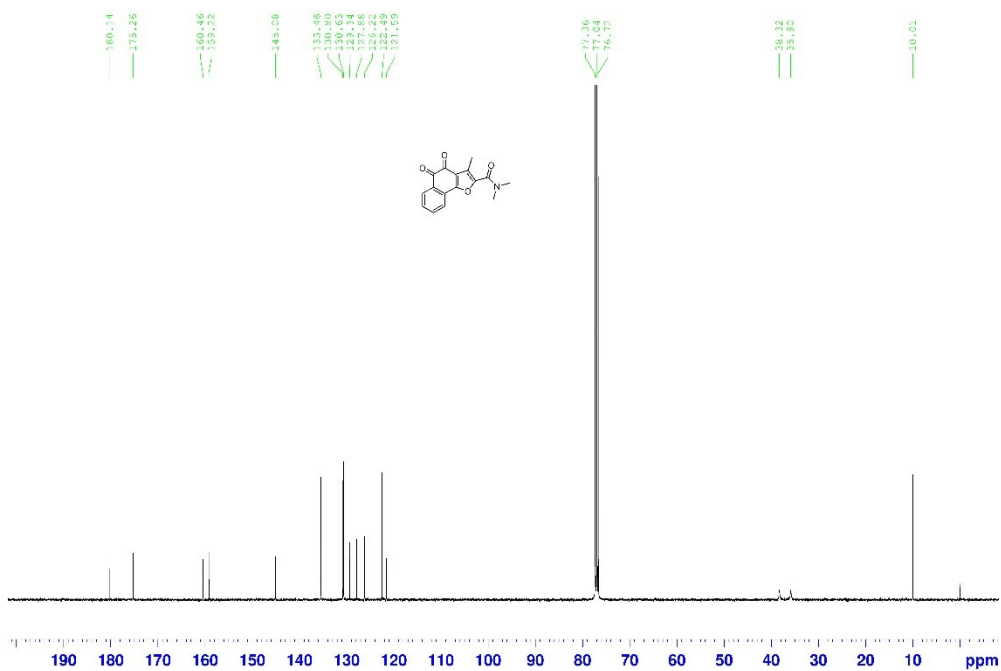

$^{13}\text{C}$  NMR spectrum of A3

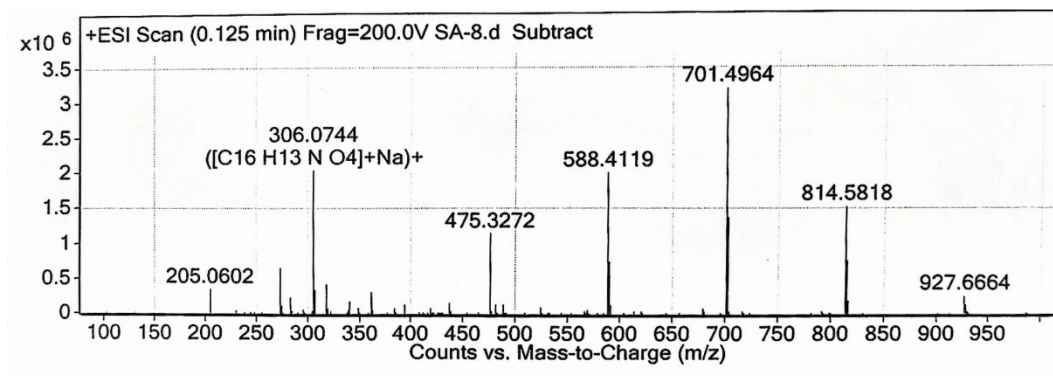

### HRMS analysis of A3

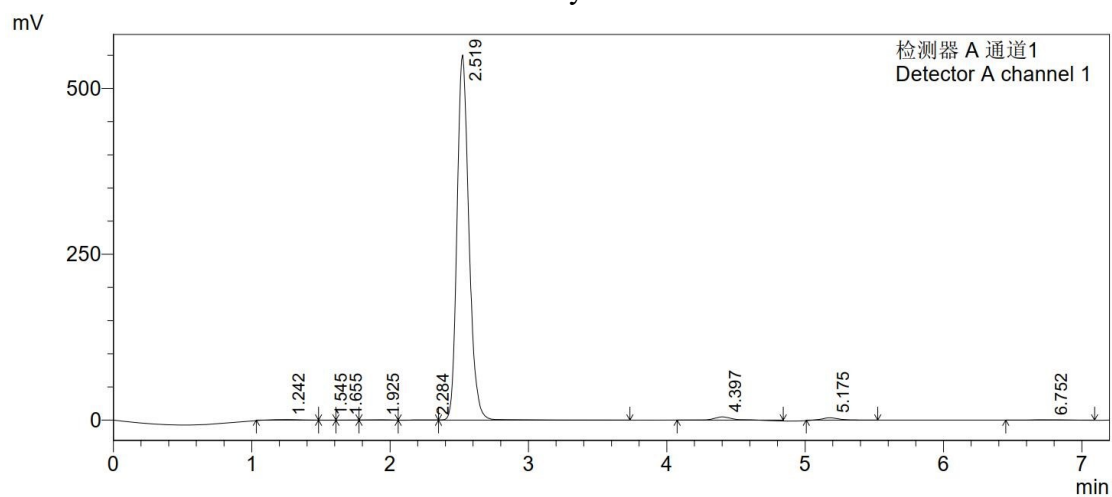

| peak  | time (min) | Area    | height | Area %  | height % |
|-------|------------|---------|--------|---------|----------|
| 1     | 1.242      | 10993   | 890    | 0.326   | 0.159    |
| 2     | 1.545      | 1525    | 248    | 0.045   | 0.044    |
| 3     | 1.655      | 1707    | 219    | 0.051   | 0.039    |
| 4     | 1.925      | 4441    | 555    | 0.132   | 0.099    |
| 5     | 2.284      | 3231    | 295    | 0.096   | 0.052    |
| 6     | 2.519      | 3279781 | 550658 | 97.111  | 98.056   |
| 7     | 4.397      | 41396   | 4788   | 1.226   | 0.853    |
| 8     | 5.175      | 27910   | 3425   | 0.826   | 0.610    |
| 9     | 6.752      | 6366    | 496    | 0.188   | 0.088    |
| total |            | 3377350 | 561574 | 100.000 | 100.000  |

### HPLC analysis of A3

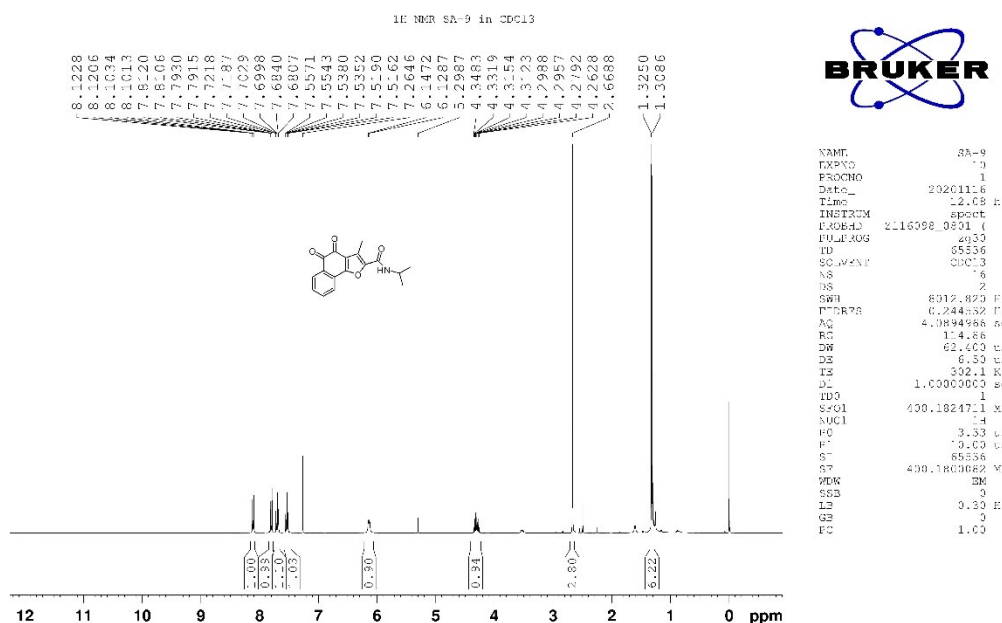

<sup>1</sup>H NMR spectrum of A4

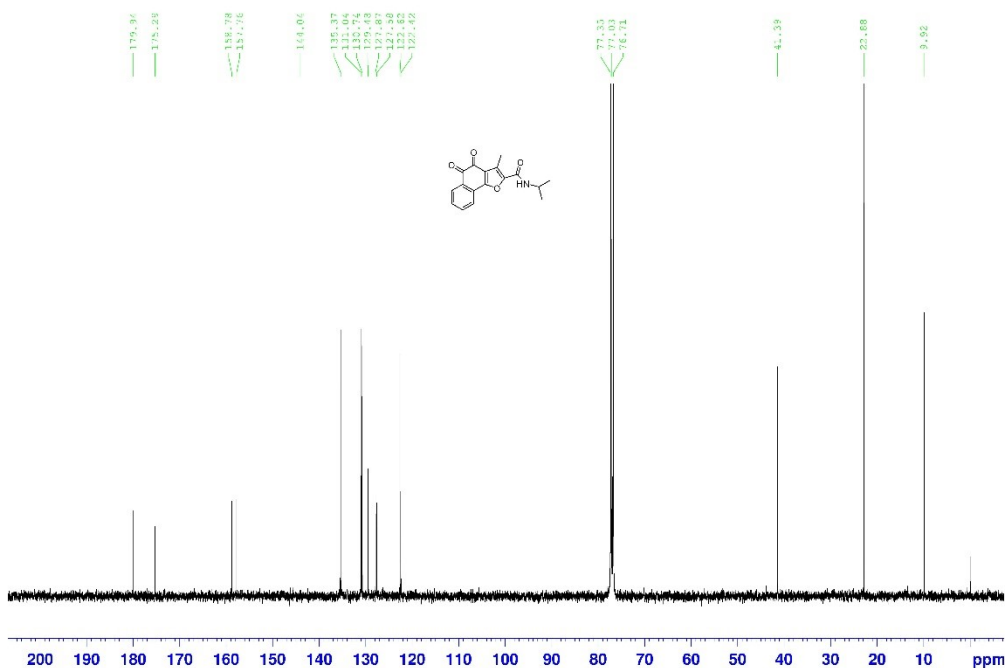

<sup>13</sup>C NMR spectrum of A4

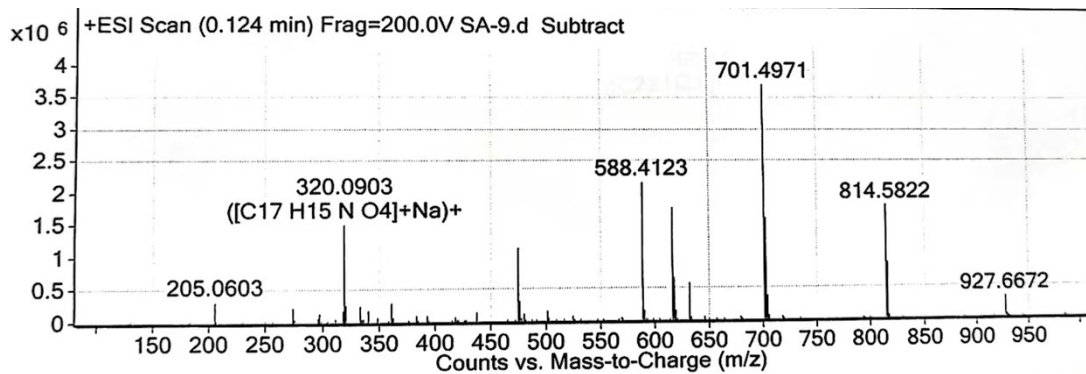

HRMS analysis of A4

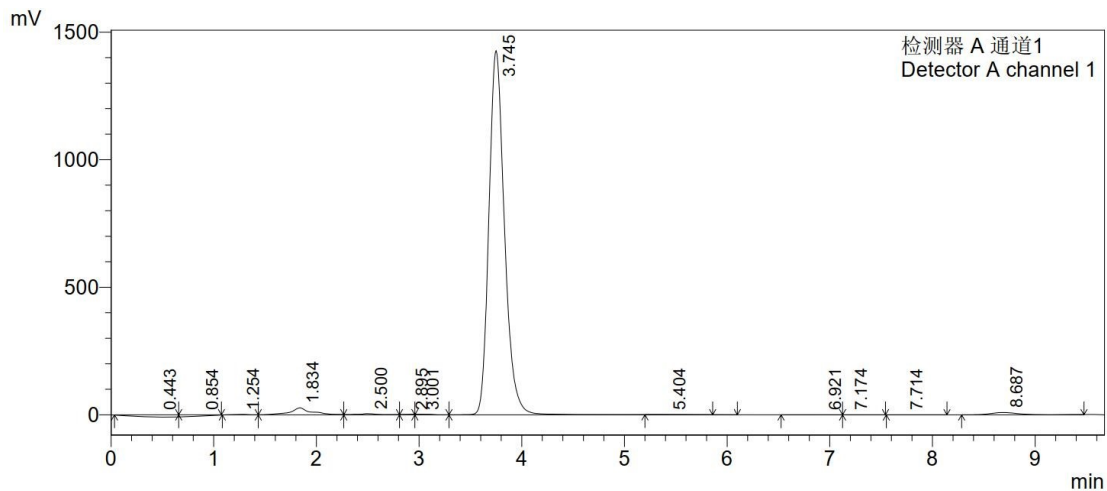

| peak  | time (min) | Area     | height  | Area %  | height % |
|-------|------------|----------|---------|---------|----------|
| 1     | 0.443      | 2381     | 120     | 0.015   | 0.008    |
| 2     | 0.854      | 1890     | 128     | 0.012   | 0.009    |
| 3     | 1.254      | 15590    | 1839    | 0.099   | 0.125    |
| 4     | 1.834      | 391990   | 27514   | 2.498   | 1.867    |
| 5     | 2.500      | 59903    | 4494    | 0.382   | 0.305    |
| 6     | 2.895      | 5603     | 709     | 0.036   | 0.048    |
| 7     | 3.001      | 6804     | 664     | 0.043   | 0.045    |
| 8     | 3.745      | 15015884 | 1427866 | 95.672  | 96.871   |
| 9     | 5.404      | 13008    | 807     | 0.083   | 0.055    |
| 10    | 6.921      | 8206     | 419     | 0.052   | 0.028    |
| 11    | 7.174      | 3631     | 245     | 0.023   | 0.017    |
| 12    | 7.714      | 1684     | 116     | 0.011   | 0.008    |
| 13    | 8.687      | 168651   | 9057    | 1.075   | 0.614    |
| total |            | 15695223 | 1473980 | 100.000 | 100.000  |

HPLC analysis of A4

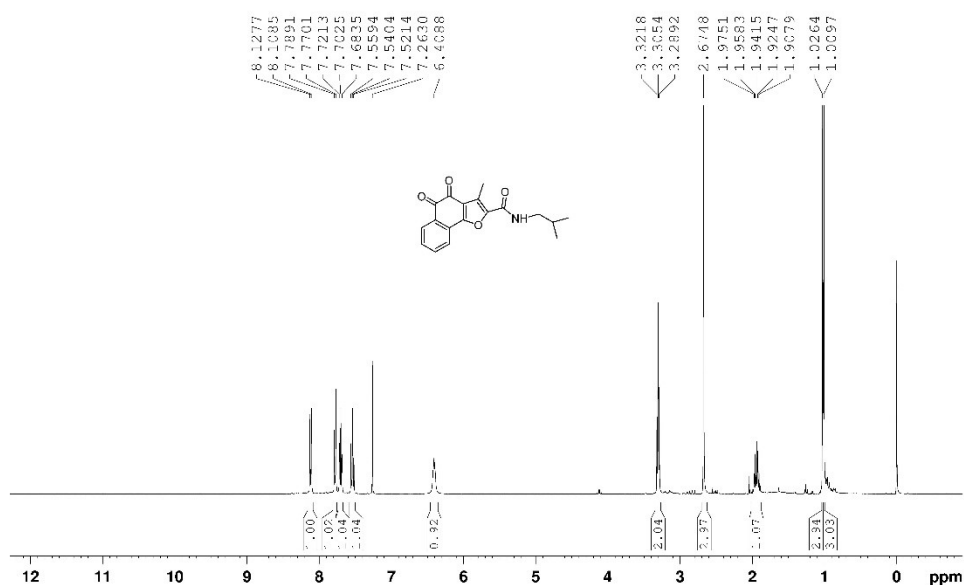

<sup>1</sup>H NMR spectrum of A5

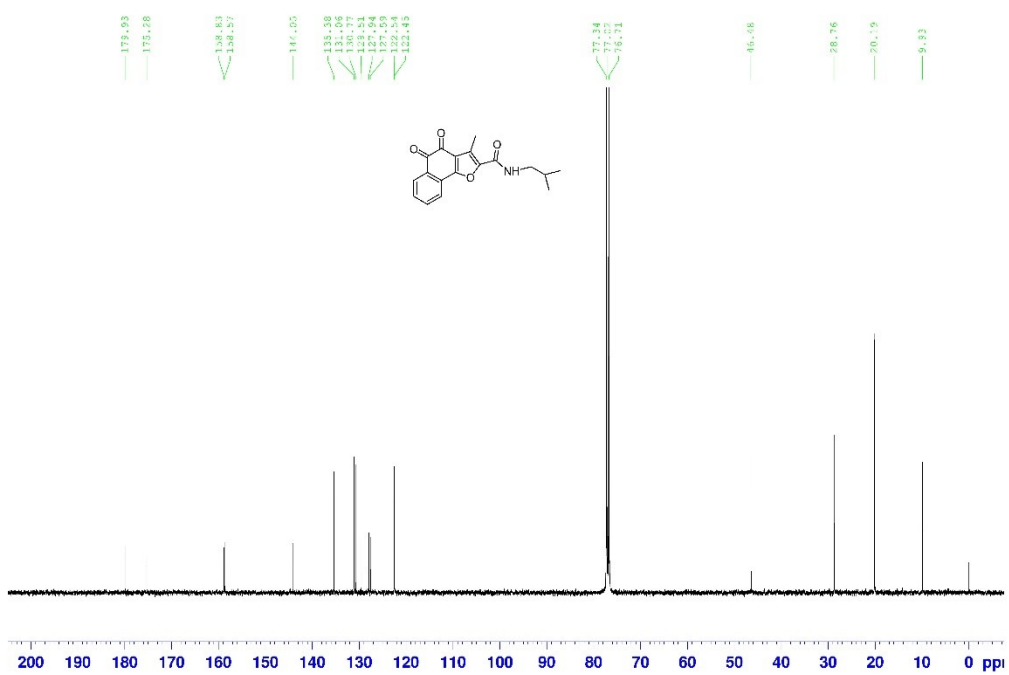

<sup>13</sup>C NMR spectrum of A5

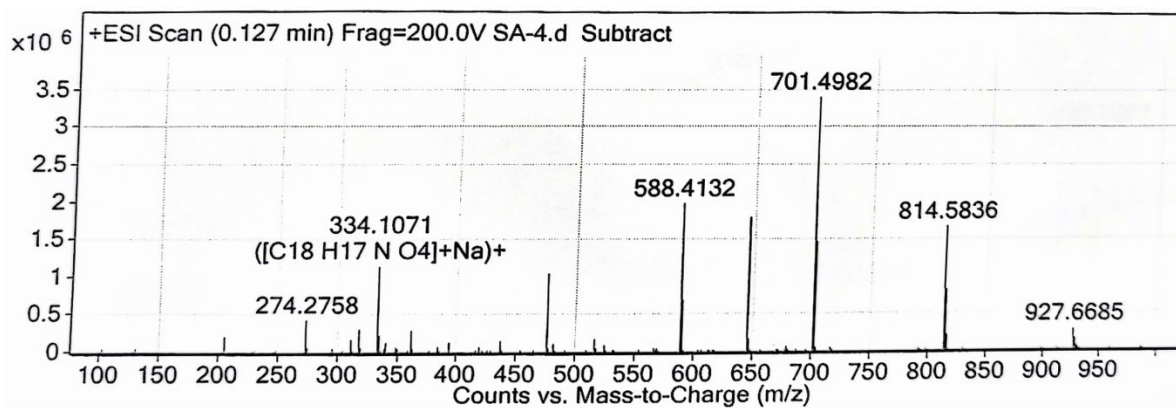

### HRMS analysis of A5

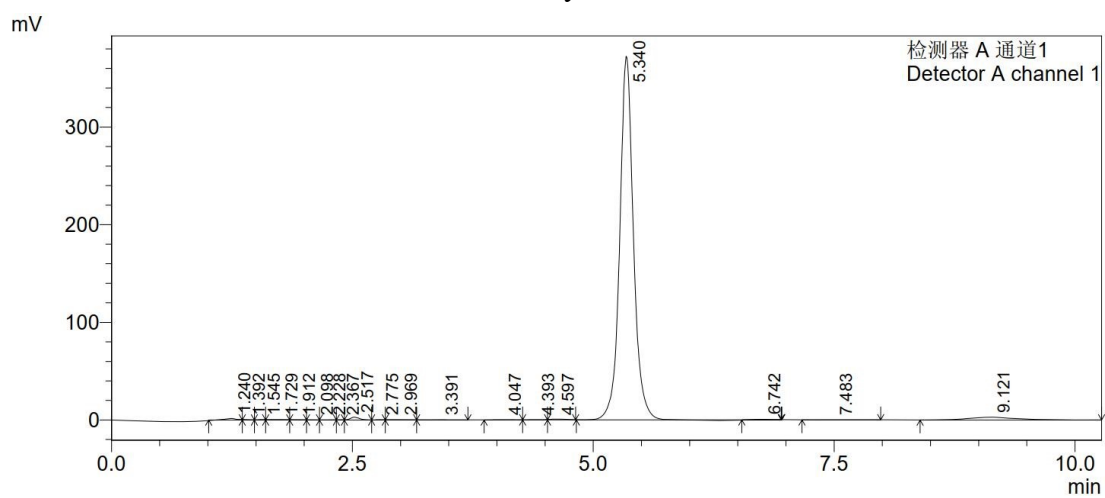







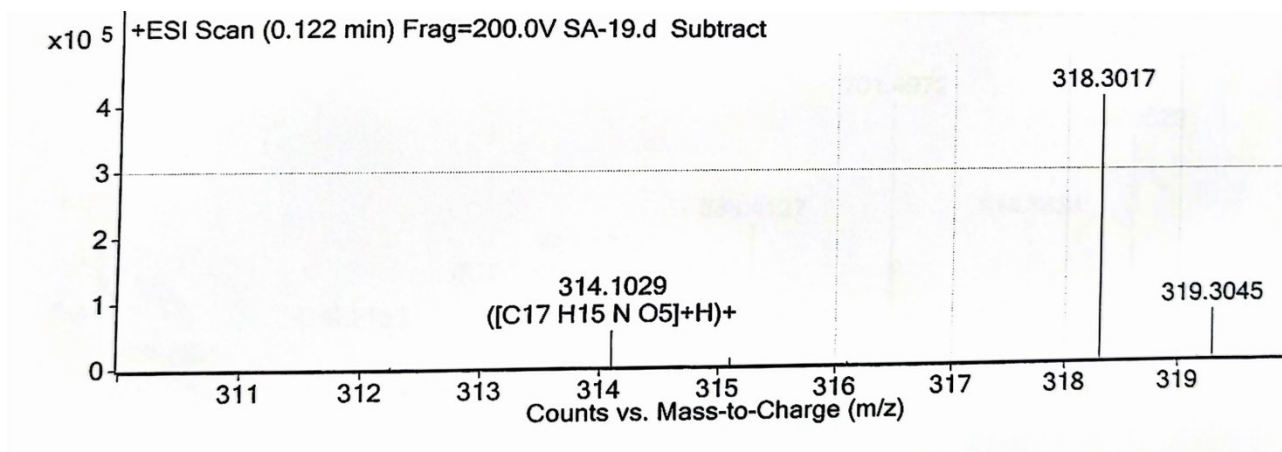

HRMS analysis of A6

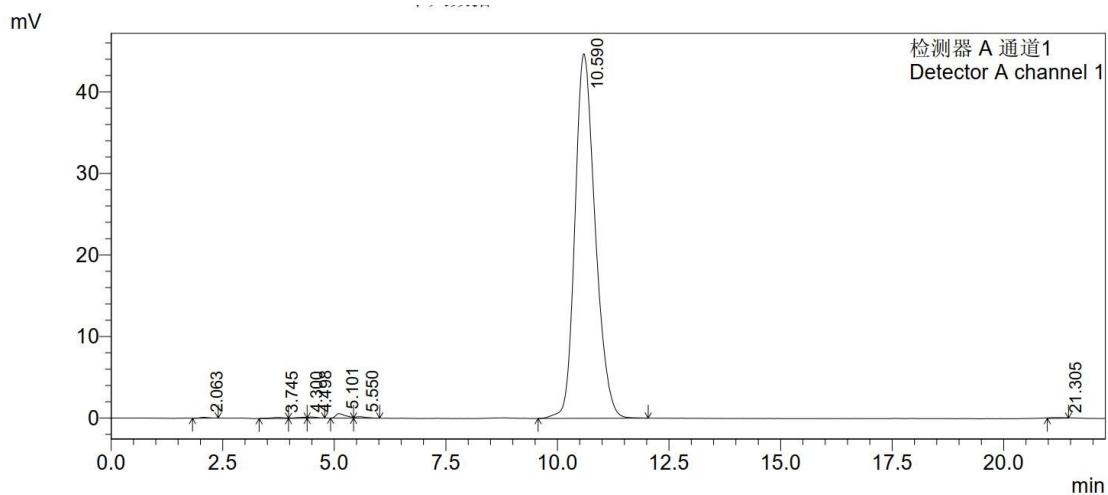

| peak  | time (min) | Area    | height | Area %  | height % |
|-------|------------|---------|--------|---------|----------|
| 1     | 2.063      | 1597    | 110    | 0.111   | 0.240    |
| 2     | 3.745      | 3058    | 131    | 0.213   | 0.285    |
| 3     | 4.300      | 2143    | 114    | 0.150   | 0.249    |
| 4     | 4.498      | 1896    | 152    | 0.132   | 0.331    |
| 5     | 5.101      | 8465    | 545    | 0.591   | 1.184    |
| 6     | 5.550      | 3079    | 171    | 0.215   | 0.372    |
| 7     | 10.590     | 1410719 | 44714  | 98.442  | 97.165   |
| 8     | 21.305     | 2086    | 80     | 0.146   | 0.174    |
| total |            | 1433043 | 46019  | 100.000 | 100.000  |

HPLC analysis of A6

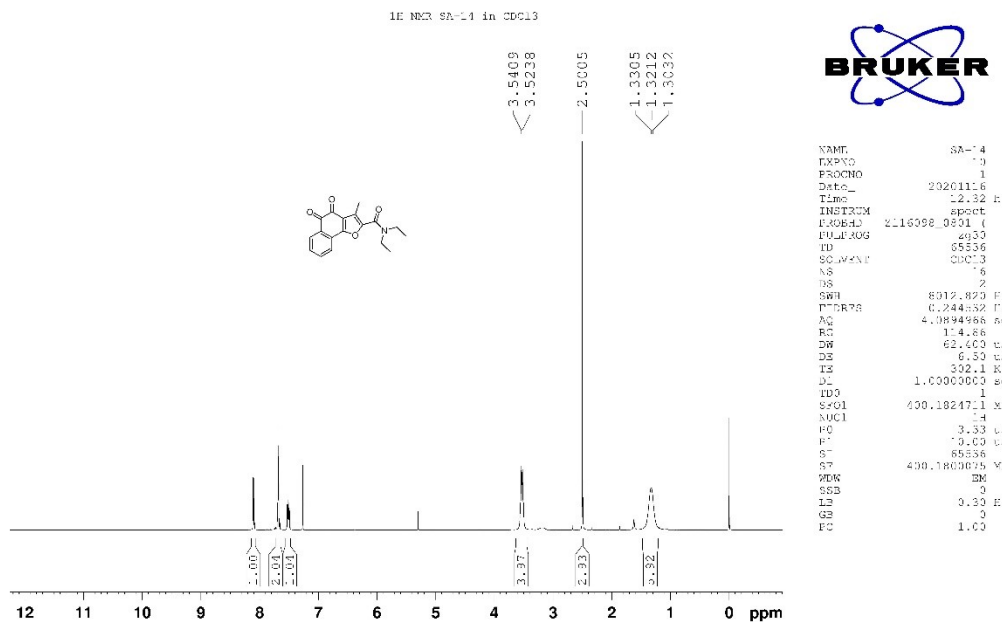

<sup>1</sup>H NMR spectrum of A7

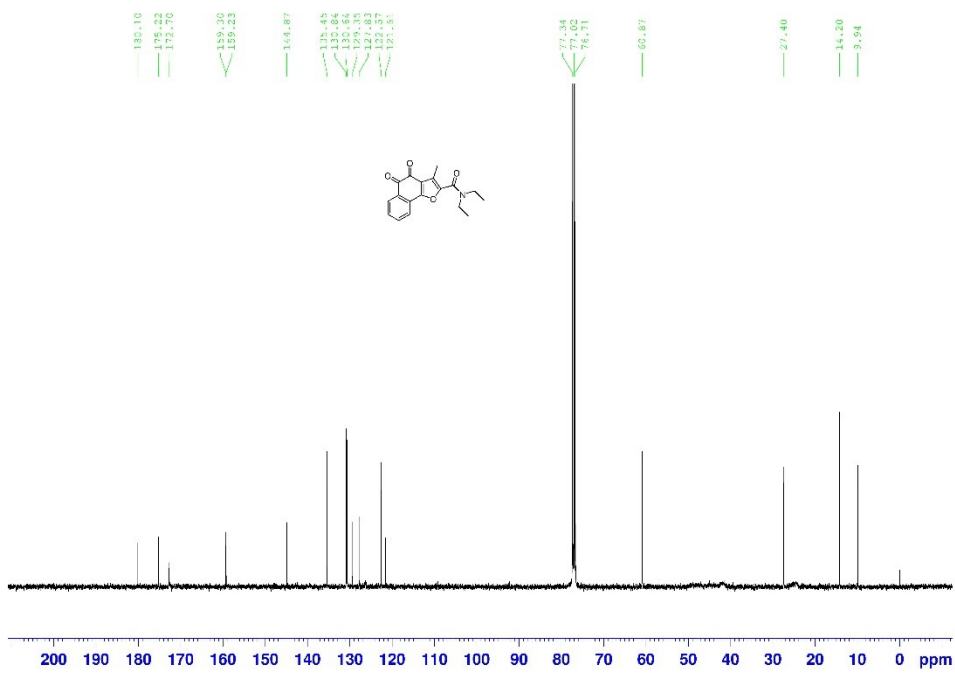

$^{13}\text{C}$  NMR spectrum of A7

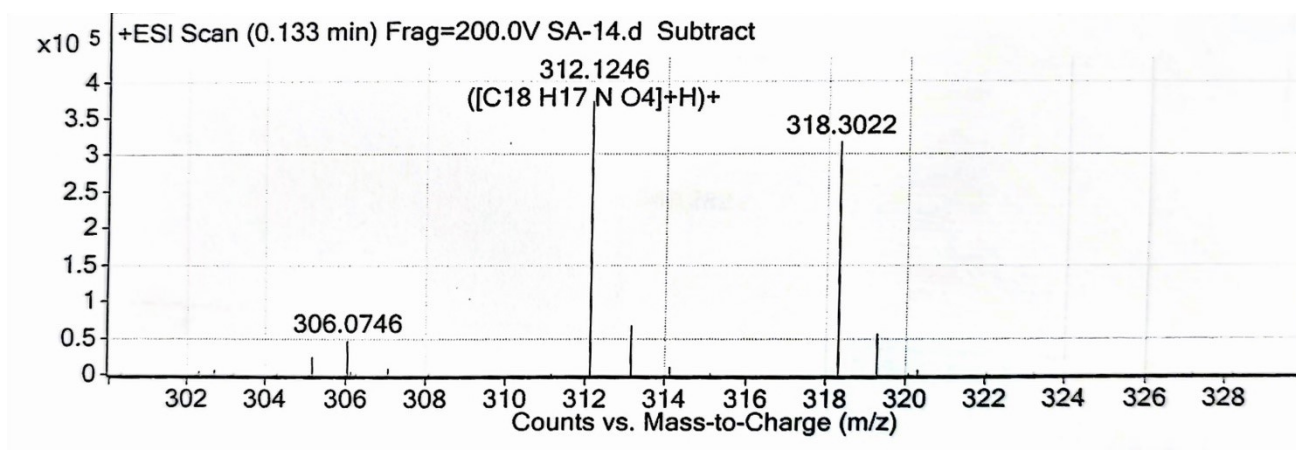

HRMS analysis of A7

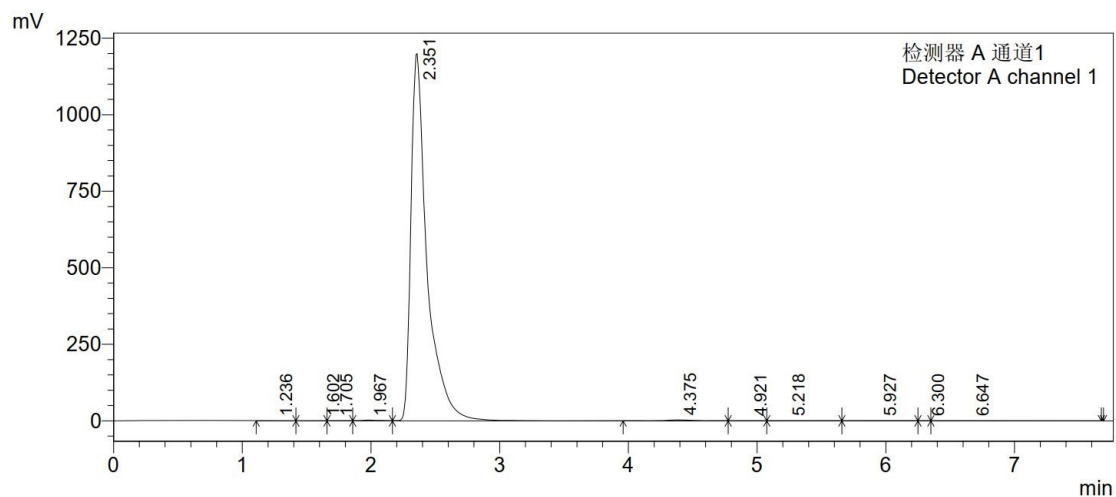

| peak  | time (min) | Area     | height  | Area %  | height % |
|-------|------------|----------|---------|---------|----------|
| 1     | 1.236      | 11546    | 1517    | 0.109   | 0.125    |
| 2     | 1.602      | 9827     | 1037    | 0.092   | 0.086    |
| 3     | 1.705      | 9572     | 982     | 0.090   | 0.081    |
| 4     | 1.967      | 25494    | 2120    | 0.240   | 0.175    |
| 5     | 2.351      | 10489402 | 1199552 | 98.635  | 99.068   |
| 6     | 4.375      | 42120    | 3099    | 0.396   | 0.256    |
| 7     | 4.921      | 5475     | 404     | 0.051   | 0.033    |
| 8     | 5.218      | 9698     | 702     | 0.091   | 0.058    |
| 9     | 5.927      | 13150    | 637     | 0.124   | 0.053    |
| 10    | 6.300      | 2016     | 340     | 0.019   | 0.028    |
| 11    | 6.647      | 16287    | 450     | 0.153   | 0.037    |
| total |            | 10634588 | 1210839 | 100.000 | 100.000  |

### HPLC analysis of A7

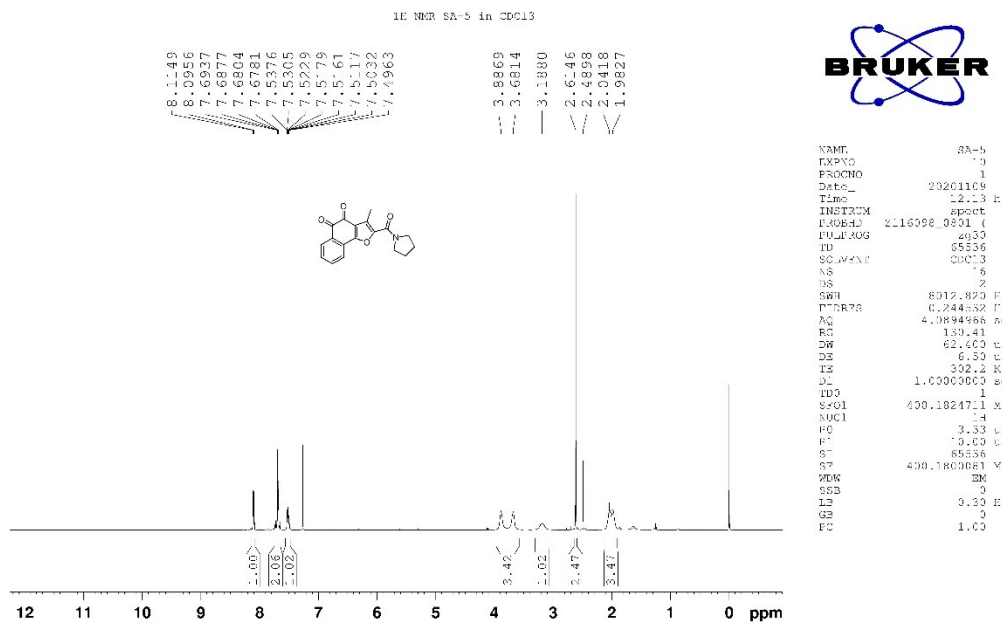

# <sup>1</sup>H NMR spectrum of A8

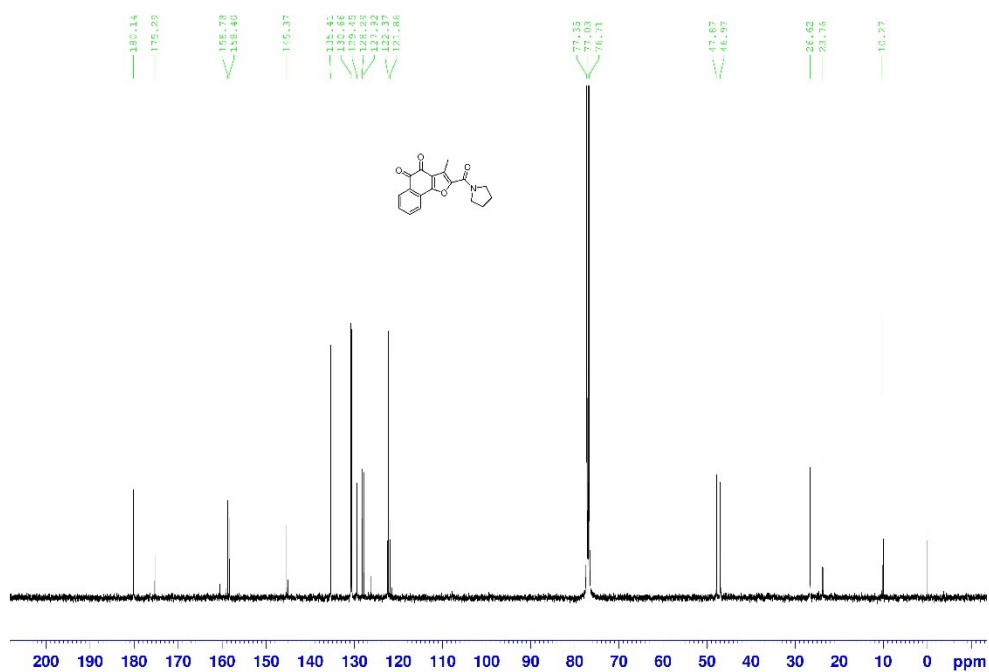

# <sup>13</sup>C NMR spectrum of A8

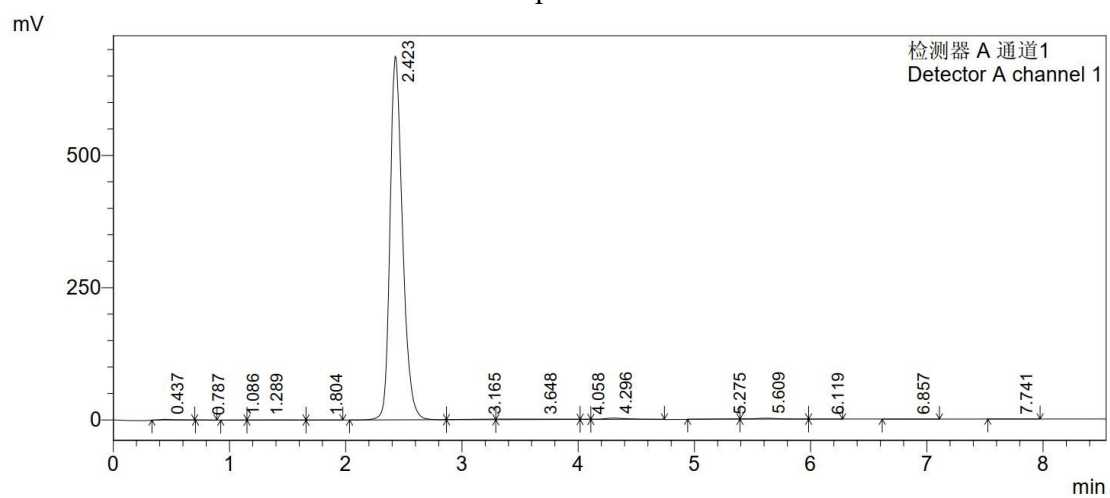

| peak  | time (min) | Area    | height | Area %  | height % |
|-------|------------|---------|--------|---------|----------|
| 1     | 0.437      | 8592    | 1323   | 0.162   | 0.190    |
| 2     | 0.787      | 1075    | 232    | 0.020   | 0.033    |
| 3     | 1.086      | 1546    | 233    | 0.029   | 0.033    |
| 4     | 1.289      | 8722    | 556    | 0.165   | 0.080    |
| 5     | 1.804      | 1864    | 263    | 0.035   | 0.038    |
| 6     | 2.423      | 5158074 | 687768 | 97.437  | 98.568   |
| 7     | 3.165      | 17026   | 829    | 0.322   | 0.119    |
| 8     | 3.648      | 30599   | 1352   | 0.578   | 0.194    |
| 9     | 4.058      | 1666    | 307    | 0.031   | 0.044    |
| 10    | 4.296      | 29094   | 2354   | 0.550   | 0.337    |
| 11    | 5.275      | 4004    | 291    | 0.076   | 0.042    |
| 12    | 5.609      | 25212   | 1766   | 0.476   | 0.253    |
| 13    | 6.119      | 1425    | 112    | 0.027   | 0.016    |
| 14    | 6.857      | 3685    | 287    | 0.070   | 0.041    |
| 15    | 7.741      | 1184    | 83     | 0.022   | 0.012    |
| total |            | 5293767 | 697757 | 100.000 | 100.000  |

### HPLC analysis of A8

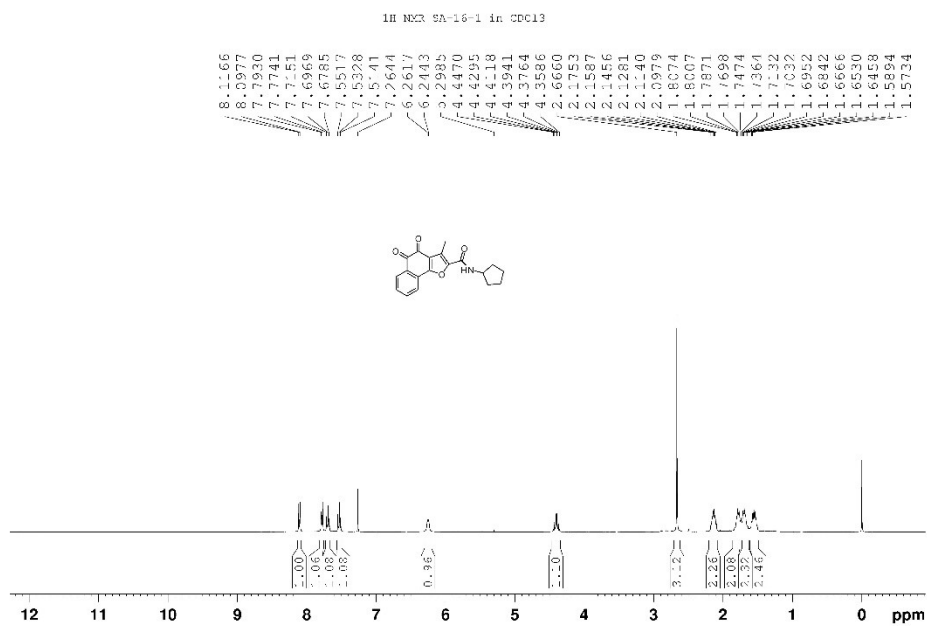

<sup>1</sup>H NMR spectrum of A9



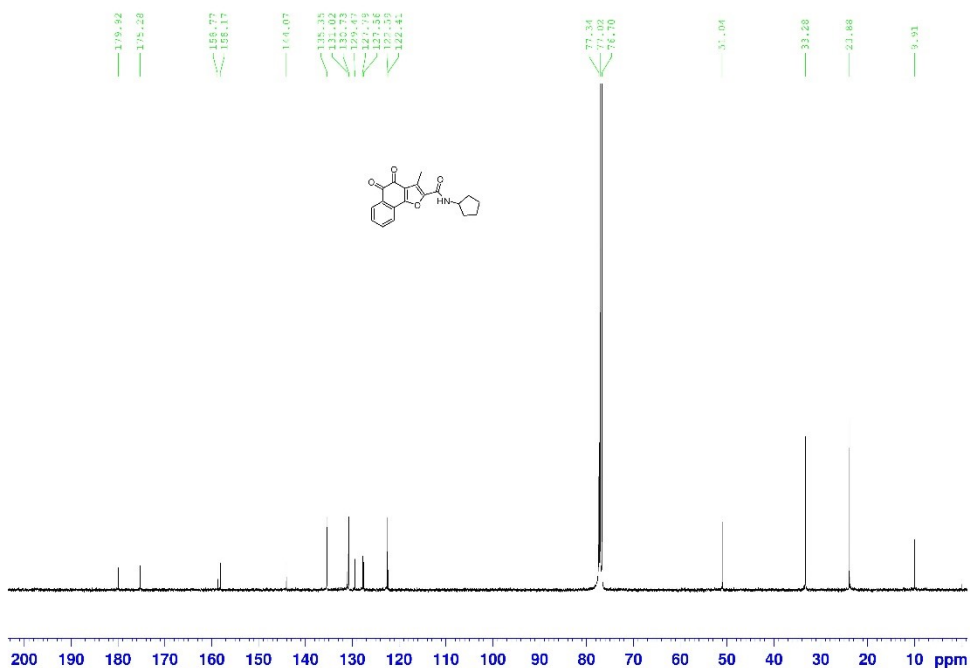

<sup>13</sup>C NMR spectrum of A9

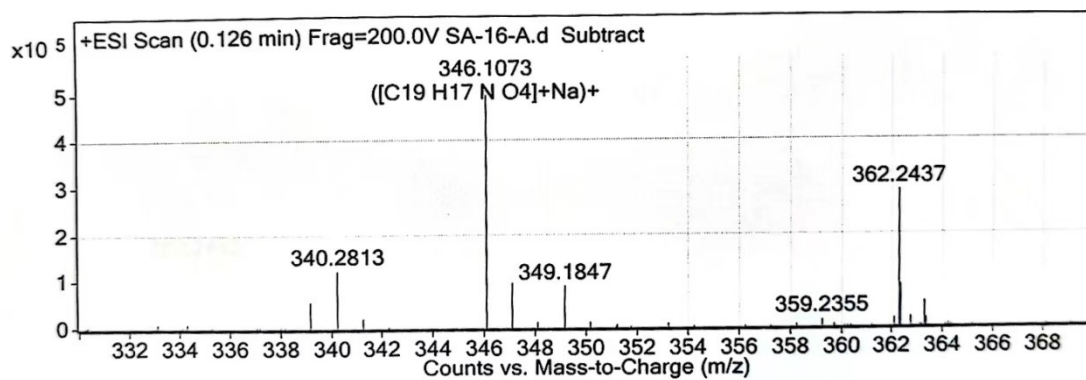

HRMS analysis of A9

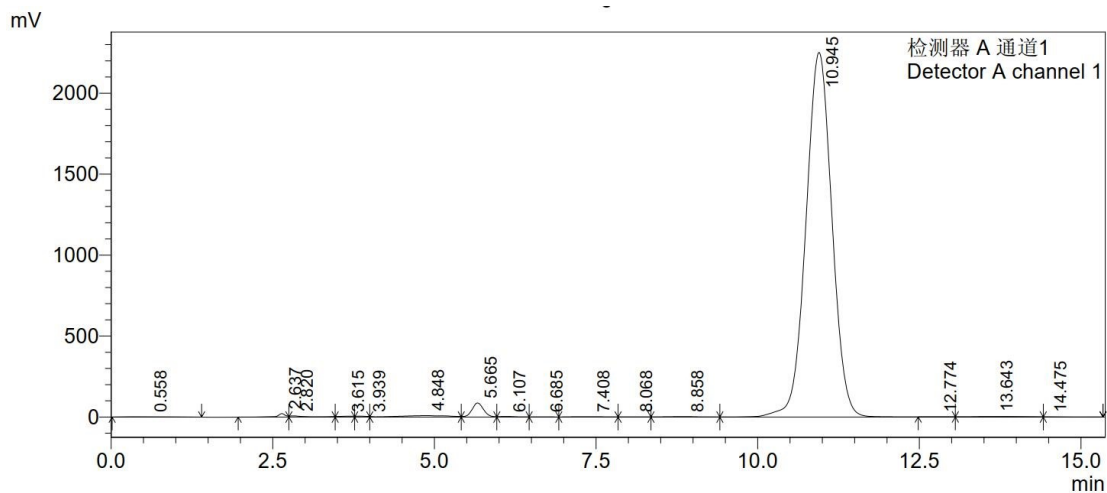

| peak  | time (min) | Area     | height  | Area %  | height % |
|-------|------------|----------|---------|---------|----------|
| 1     | 0.558      | 39522    | 939     | 0.061   | 0.039    |
| 2     | 2.637      | 174327   | 21229   | 0.267   | 0.887    |
| 3     | 2.820      | 123008   | 7213    | 0.189   | 0.301    |
| 4     | 3.615      | 20017    | 1285    | 0.031   | 0.054    |
| 5     | 3.939      | 14906    | 1141    | 0.023   | 0.048    |
| 6     | 4.848      | 466808   | 8536    | 0.716   | 0.357    |
| 7     | 5.665      | 1079400  | 86862   | 1.655   | 3.628    |
| 8     | 6.107      | 64432    | 3855    | 0.099   | 0.161    |
| 9     | 6.685      | 16860    | 849     | 0.026   | 0.035    |
| 10    | 7.408      | 70791    | 1879    | 0.109   | 0.078    |
| 11    | 8.068      | 28911    | 1255    | 0.044   | 0.052    |
| 12    | 8.858      | 89678    | 2804    | 0.137   | 0.117    |
| 13    | 10.945     | 62926151 | 2252389 | 96.459  | 94.080   |
| 14    | 12.774     | 2916     | 134     | 0.004   | 0.006    |
| 15    | 13.643     | 109779   | 3463    | 0.168   | 0.145    |
| 16    | 14.475     | 8340     | 289     | 0.013   | 0.012    |
| total |            | 65235846 | 2394120 | 100.000 | 100.000  |

### HPLC analysis of A9

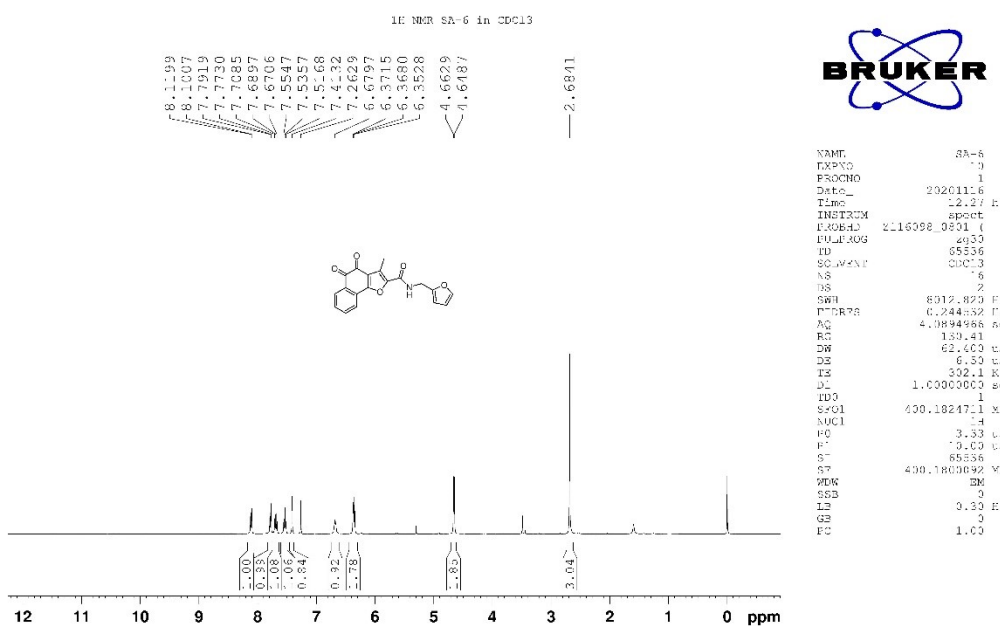

### <sup>1</sup>H NMR spectrum of A10

$^{13}\text{C}$  NMR SA-6 in  $\text{CDCl}_3$

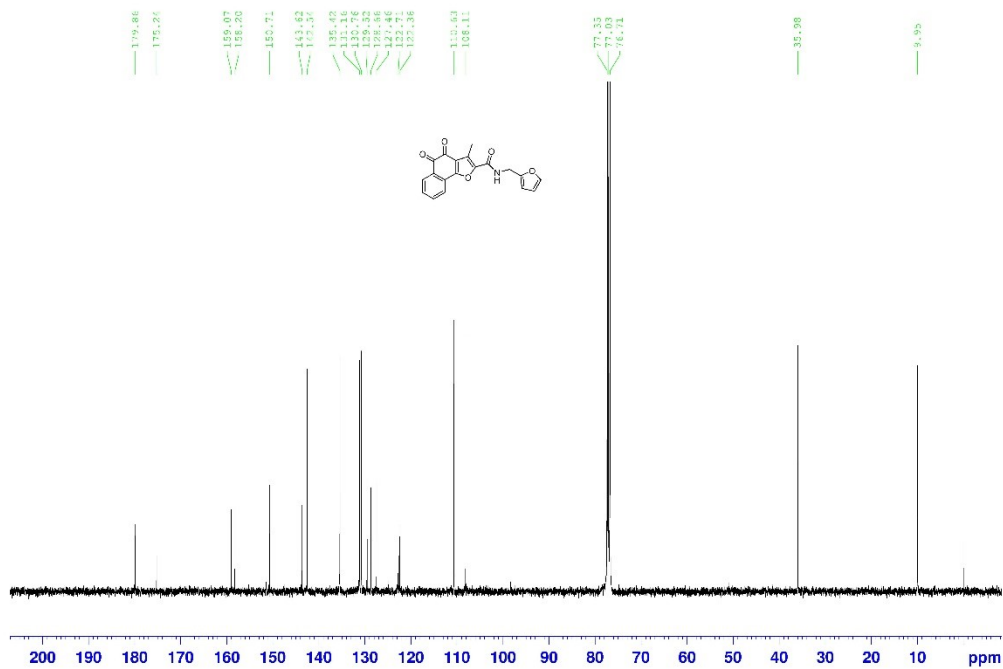

$^{13}\text{C}$  NMR spectrum of A10

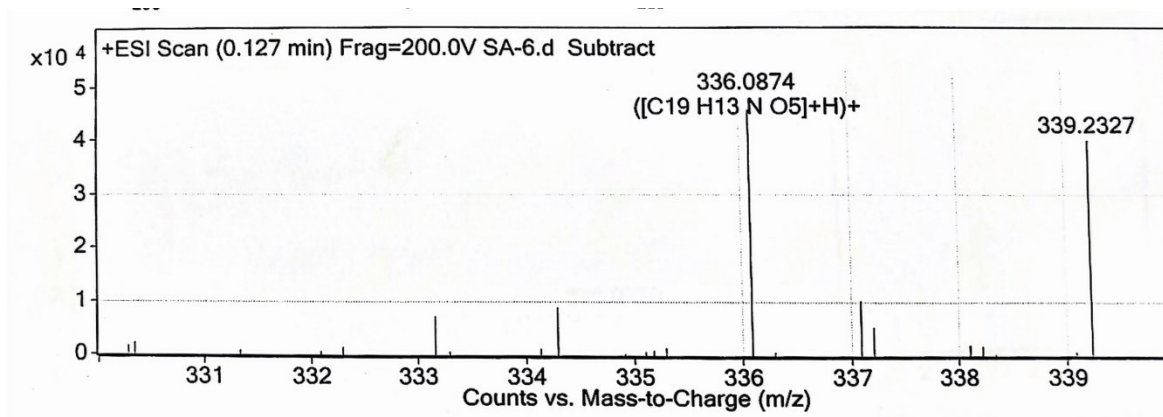

### HRMS analysis of A10

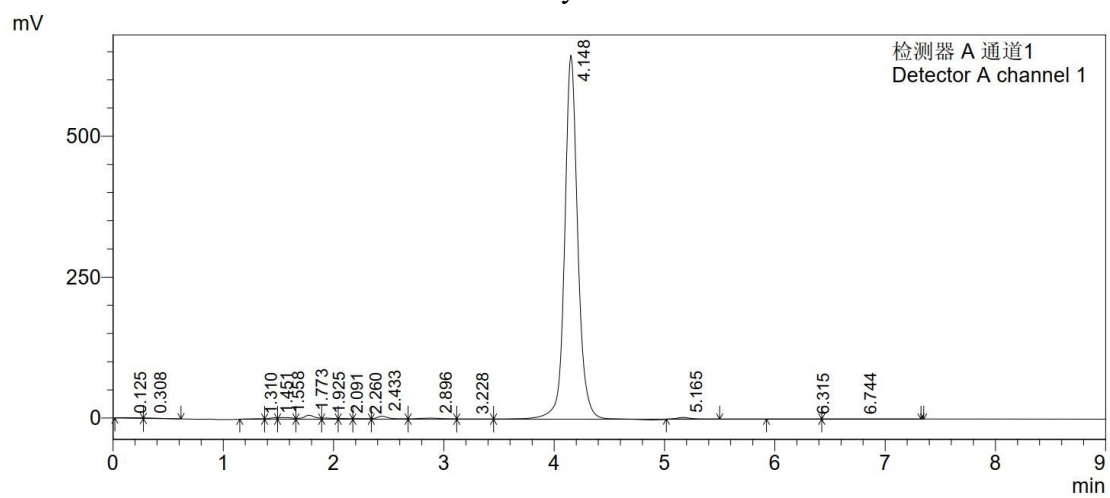

| peak  | time (min) | Area    | height | Area %  | height % |
|-------|------------|---------|--------|---------|----------|
| 1     | 0.125      | 6803    | 438    | 0.122   | 0.065    |
| 2     | 0.308      | 9051    | 811    | 0.162   | 0.120    |
| 3     | 1.310      | 6961    | 881    | 0.125   | 0.130    |
| 4     | 1.451      | 12314   | 2384   | 0.221   | 0.353    |
| 5     | 1.558      | 23544   | 3038   | 0.422   | 0.449    |
| 6     | 1.773      | 50545   | 7001   | 0.905   | 1.036    |
| 7     | 1.925      | 13469   | 1942   | 0.241   | 0.287    |
| 8     | 2.091      | 8338    | 1239   | 0.149   | 0.183    |
| 9     | 2.260      | 9658    | 1100   | 0.173   | 0.163    |
| 10    | 2.433      | 41175   | 5340   | 0.738   | 0.790    |
| 11    | 2.896      | 28228   | 2025   | 0.506   | 0.299    |
| 12    | 3.228      | 9012    | 650    | 0.161   | 0.096    |
| 13    | 4.148      | 5329067 | 645631 | 95.462  | 95.501   |
| 14    | 5.165      | 24432   | 2967   | 0.438   | 0.439    |
| 15    | 6.315      | 1404    | 89     | 0.025   | 0.013    |
| 16    | 6.744      | 8398    | 512    | 0.150   | 0.076    |
| total |            | 5582398 | 676047 | 100.000 | 100.000  |

### HPLC analysis of A10

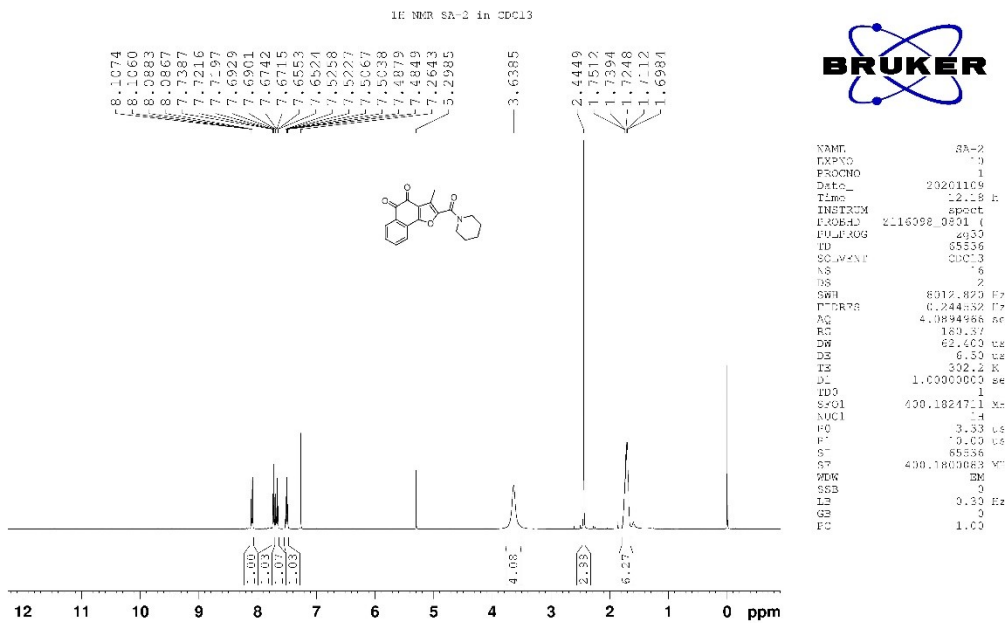

### <sup>1</sup>H NMR spectrum of A11

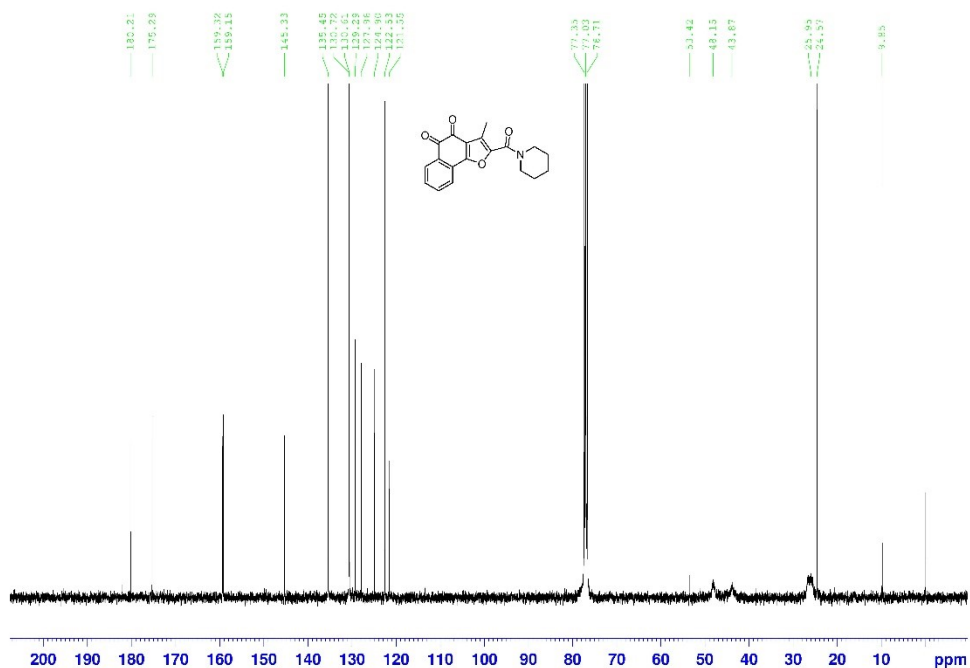

<sup>13</sup>C NMR spectrum of A11

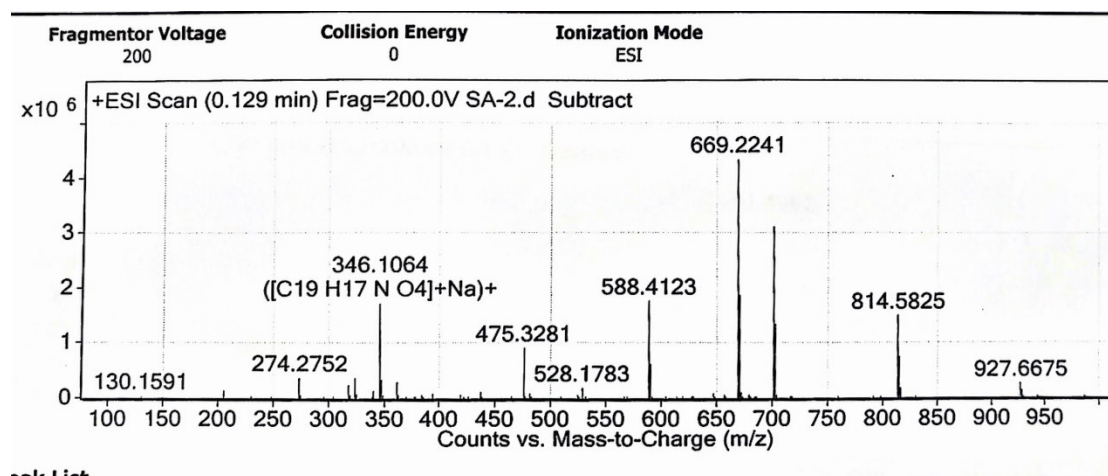

Peak List

HRMS analysis of A11

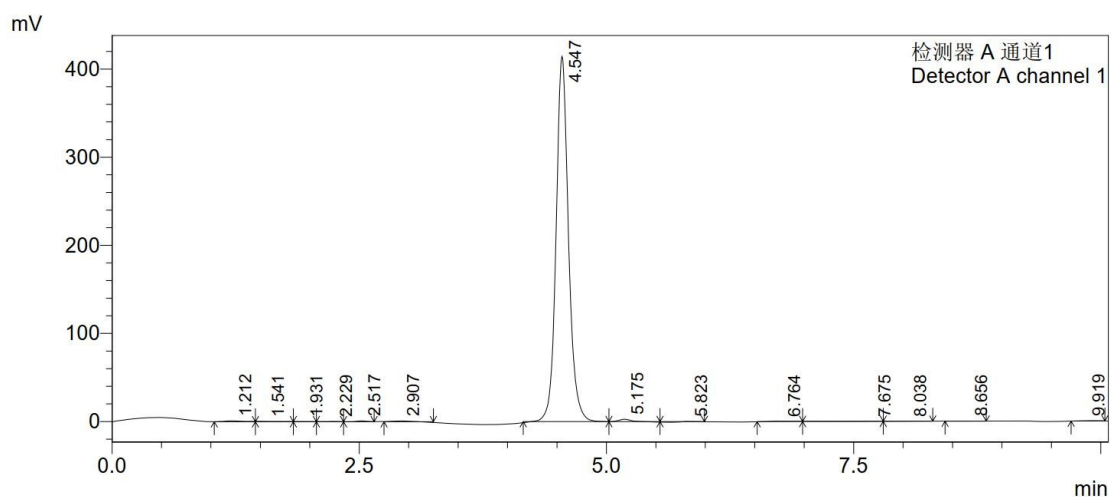

| peak  | time(min) | Area    | height | Area %  | height % |
|-------|-----------|---------|--------|---------|----------|
| 1     | 1.212     | 11017   | 969    | 0.297   | 0.229    |
| 2     | 1.541     | 5270    | 405    | 0.142   | 0.096    |
| 3     | 1.931     | 2761    | 301    | 0.075   | 0.071    |
| 4     | 2.229     | 2990    | 274    | 0.081   | 0.065    |
| 5     | 2.517     | 6710    | 881    | 0.181   | 0.208    |
| 6     | 2.907     | 9934    | 834    | 0.268   | 0.197    |
| 7     | 4.547     | 3614482 | 415068 | 97.564  | 98.106   |
| 8     | 5.175     | 23543   | 2755   | 0.635   | 0.651    |
| 9     | 5.823     | 1408    | 142    | 0.038   | 0.034    |
| 10    | 6.764     | 6247    | 499    | 0.169   | 0.118    |
| 11    | 7.675     | 8919    | 225    | 0.241   | 0.053    |
| 12    | 8.038     | 5256    | 203    | 0.142   | 0.048    |
| 13    | 8.656     | 2046    | 124    | 0.055   | 0.029    |
| 14    | 9.919     | 4129    | 399    | 0.111   | 0.094    |
| total |           | 3704713 | 423081 | 100.000 | 100.000  |

HPLC analysis of A11

<sup>13</sup>C NMR SA-1 in DMSO

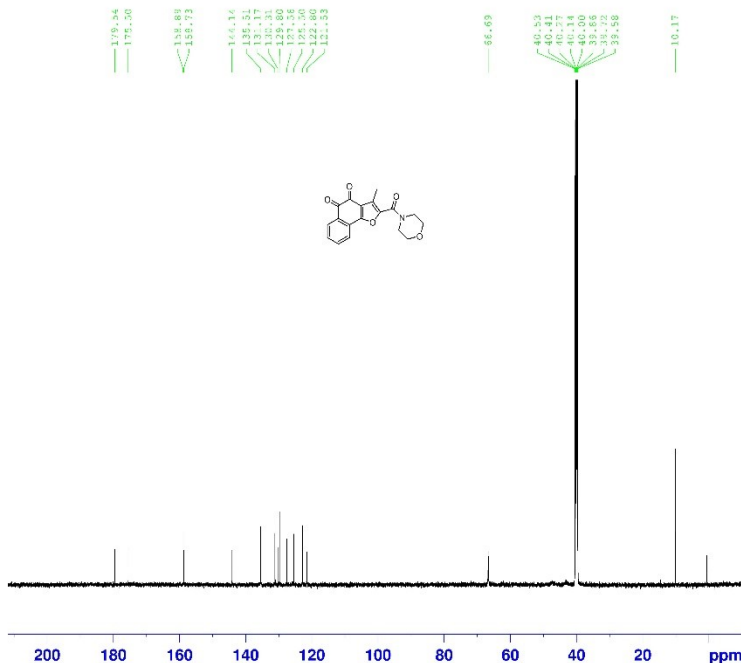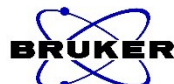

```

NAME SA-1
EXPNO 30
PROCNO 1
Date_ 20201107
Time 9:35 h
INSTRUM Avance Neo
PROBHD Z157363-0004 (
PULPROG zgpg30
TE 300.2K
SOLVENT DMSO
NS 97
DS 2
SWH 37037.035 Hz
FIDRES 1.130285 Hz
AQ 0.8847860 sec
RG 171.5 Hz
DN 13.500 usec
DE 18.00 usec
RF 285.0 K
DI 2.0000000 sec
D11 0.0300000 sec
TEO 1
SFO1 150.9186593 MHz
NUC1 13C
PQ 3.33 usec
PL 10.00 usec
SI 32768
SF 150.9028085 MHz
WDW EM
SSB 0
LB 1.00 Hz
GB 0
PC 1.40
  
```

<sup>1</sup>H NMR spectrum of A12

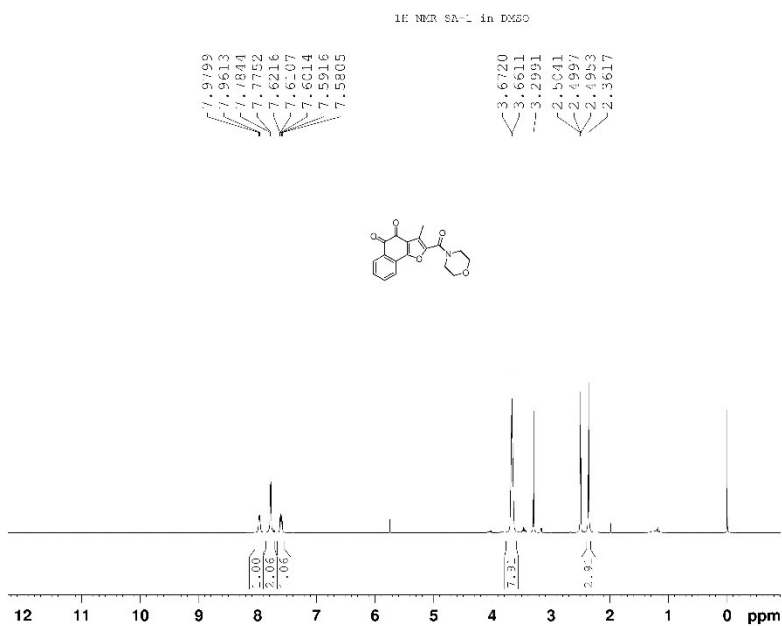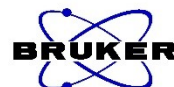

```

NAME SA-1
EXPNO 1
PROCNO 1
Date_ 20201107
Time 12:13 h
INSTRUM spect
PROBHD Z116098-0601 (
PULPROG zgpg30
TE 300.2K
SOLVENT DMSO
NS 97
DS 2
SWH 6012.823 Hz
FIDRES 0.244532 Hz
AQ 4.0894966 sec
RG 236.9 Hz
DN 62.400 usec
DE 6.30 usec
RF 302.1 K
DI 1.0000000 sec
TEO 1
SFO1 400.1824711 MHz
NUC1 1H
PQ 3.33 usec
PL 0.00 usec
SI 65536
SF 400.1863628 MHz
WDW EM
SSB 0
LB 3.33 Hz
GB 0
PC 1.00
  
```

<sup>13</sup>C NMR spectrum of A12



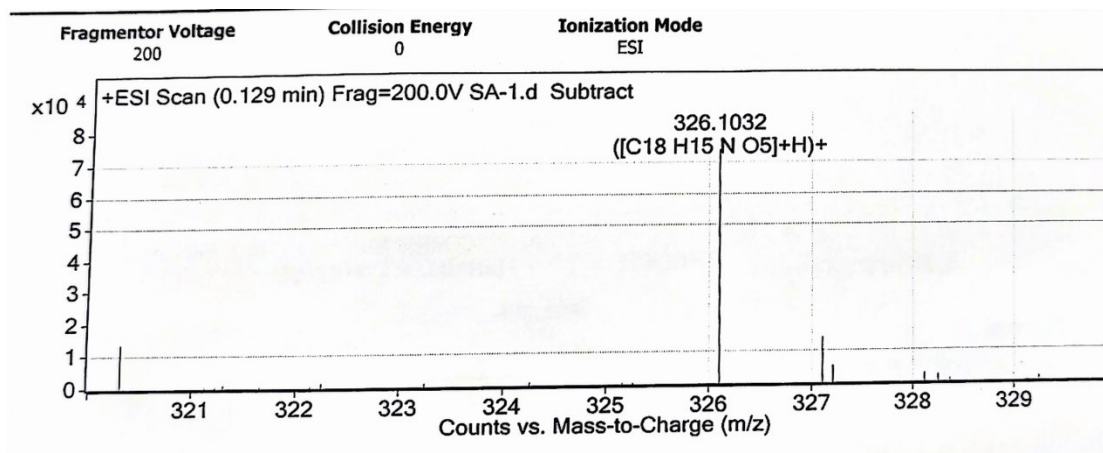

HRMS analysis of A12

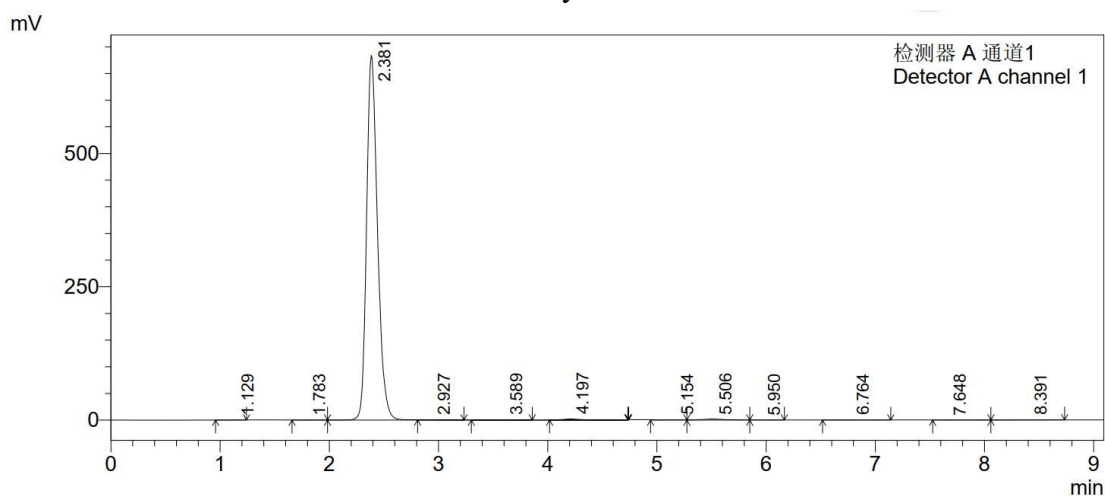

| peak  | Time (min) | Area    | height | Area %  | height % |
|-------|------------|---------|--------|---------|----------|
| 1     | 1.129      | 1905    | 273    | 0.039   | 0.039    |
| 2     | 1.783      | 2000    | 288    | 0.041   | 0.042    |
| 3     | 2.381      | 4753339 | 683915 | 98.358  | 98.954   |
| 4     | 2.927      | 4335    | 489    | 0.090   | 0.071    |
| 5     | 3.589      | 7890    | 814    | 0.163   | 0.118    |
| 6     | 4.197      | 22426   | 2213   | 0.464   | 0.320    |
| 7     | 5.154      | 3825    | 376    | 0.079   | 0.054    |
| 8     | 5.506      | 24682   | 1866   | 0.511   | 0.270    |
| 9     | 5.950      | 1565    | 131    | 0.032   | 0.019    |
| 10    | 6.764      | 3831    | 298    | 0.079   | 0.043    |
| 11    | 7.648      | 1590    | 101    | 0.033   | 0.015    |
| 12    | 8.391      | 5328    | 384    | 0.110   | 0.056    |
| total |            | 4832716 | 691148 | 100.000 | 100.000  |

HPLC analysis of A12

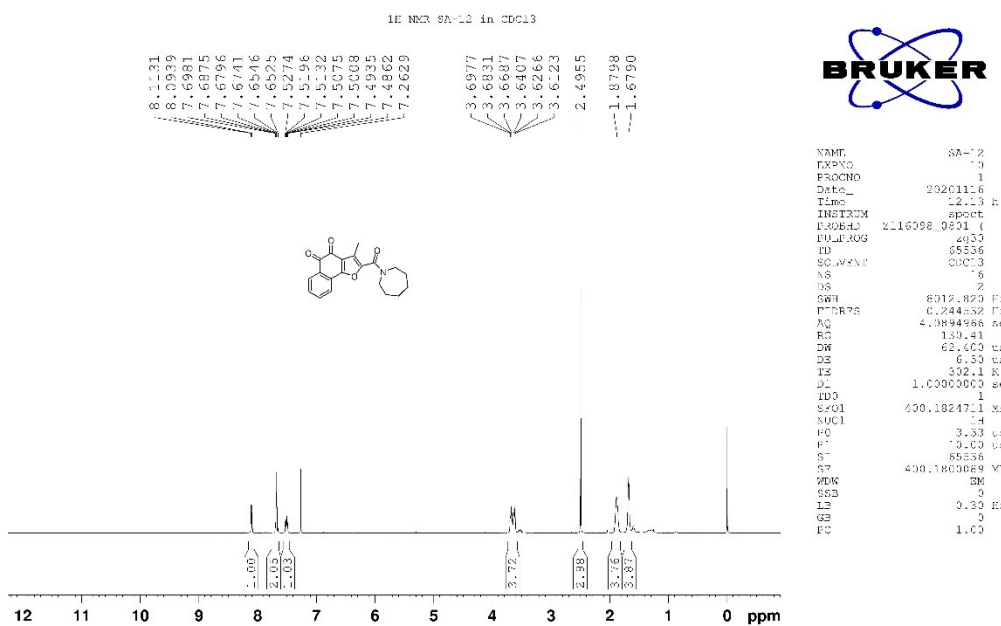

<sup>1</sup>H NMR spectrum of A13

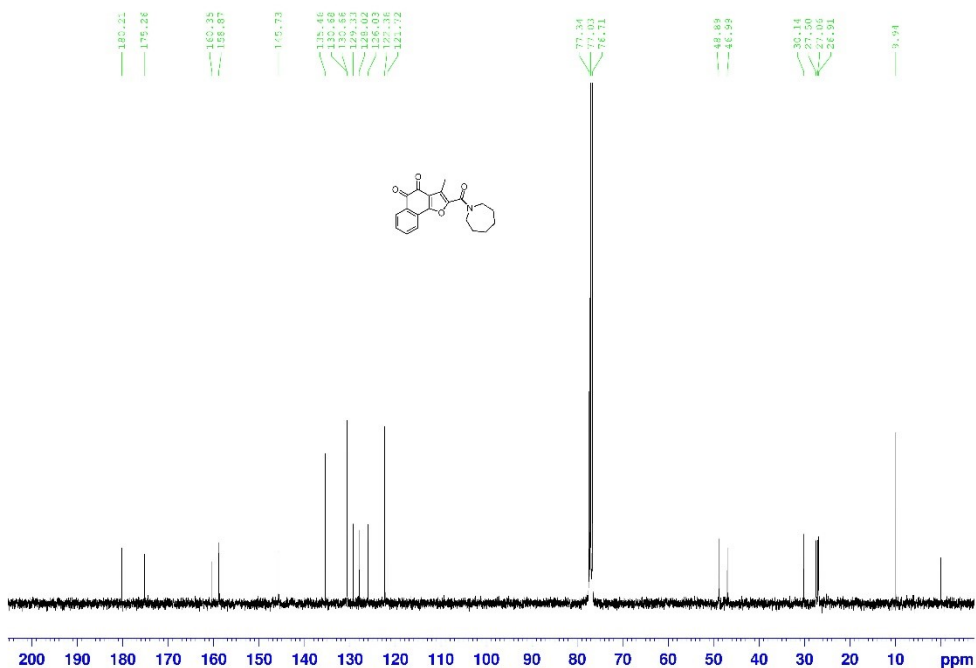

<sup>13</sup>C NMR spectrum of A13

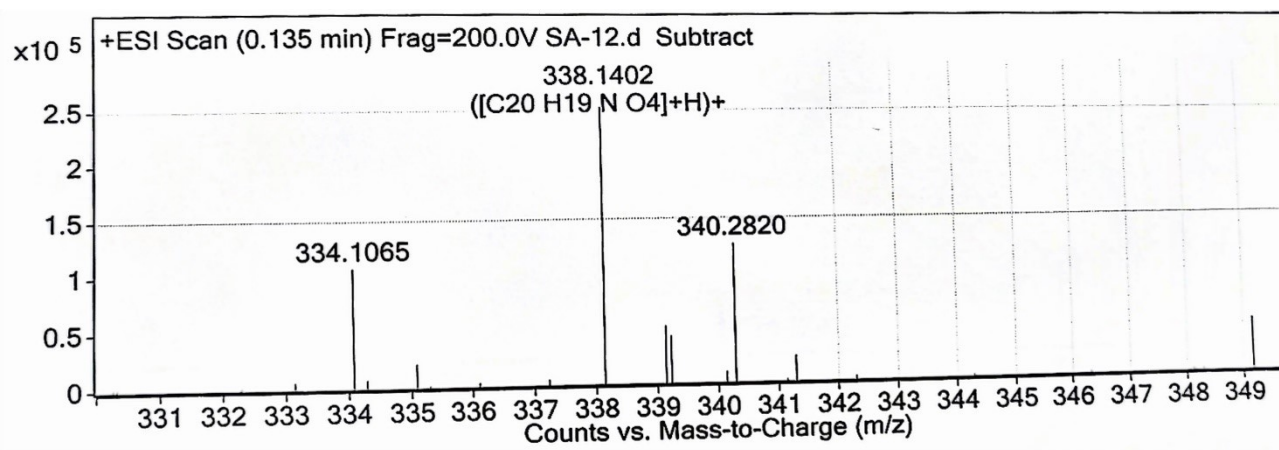

### HRMS analysis of A13

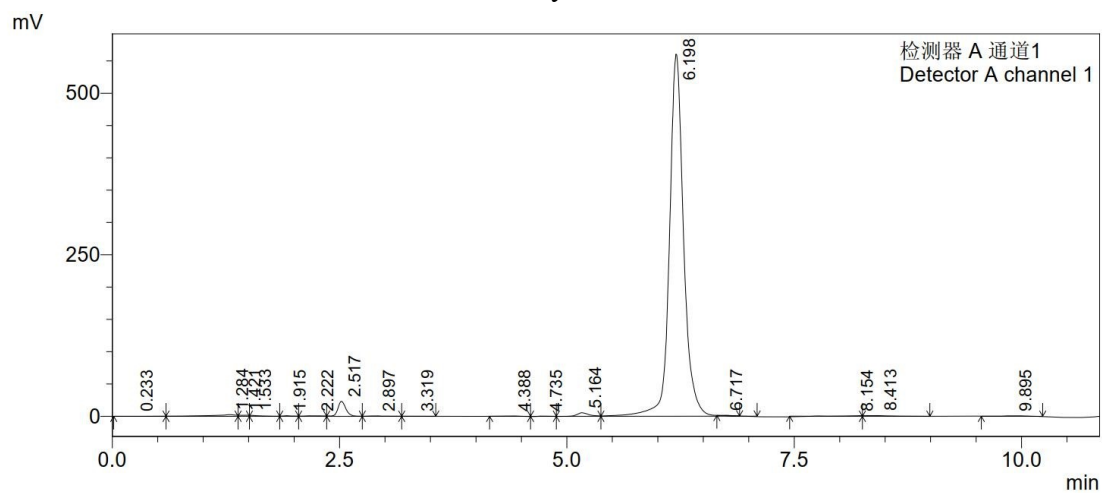

| peak  | time (min) | Area   | height | Area %  | height % |
|-------|------------|--------|--------|---------|----------|
| 1     | 0.169      | 1112   | 77     | 0.212   | 0.159    |
| 2     | 1.312      | 2223   | 274    | 0.425   | 0.562    |
| 3     | 2.517      | 11529  | 1856   | 2.202   | 3.806    |
| 4     | 6.198      | 500506 | 45981  | 95.606  | 94.297   |
| 5     | 8.098      | 1231   | 113    | 0.235   | 0.232    |
| 6     | 8.415      | 5888   | 396    | 1.125   | 0.813    |
| 7     | 9.897      | 1019   | 64     | 0.195   | 0.132    |
| total |            | 523507 | 48762  | 100.000 | 100.000  |

### HPLC analysis of A13

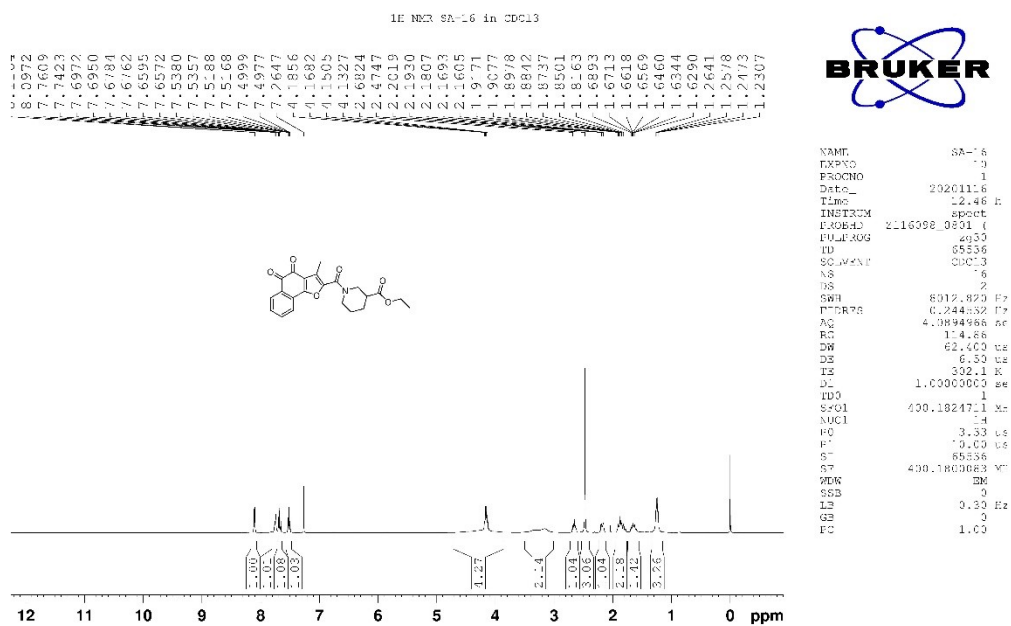

<sup>1</sup>H NMR spectrum of A14

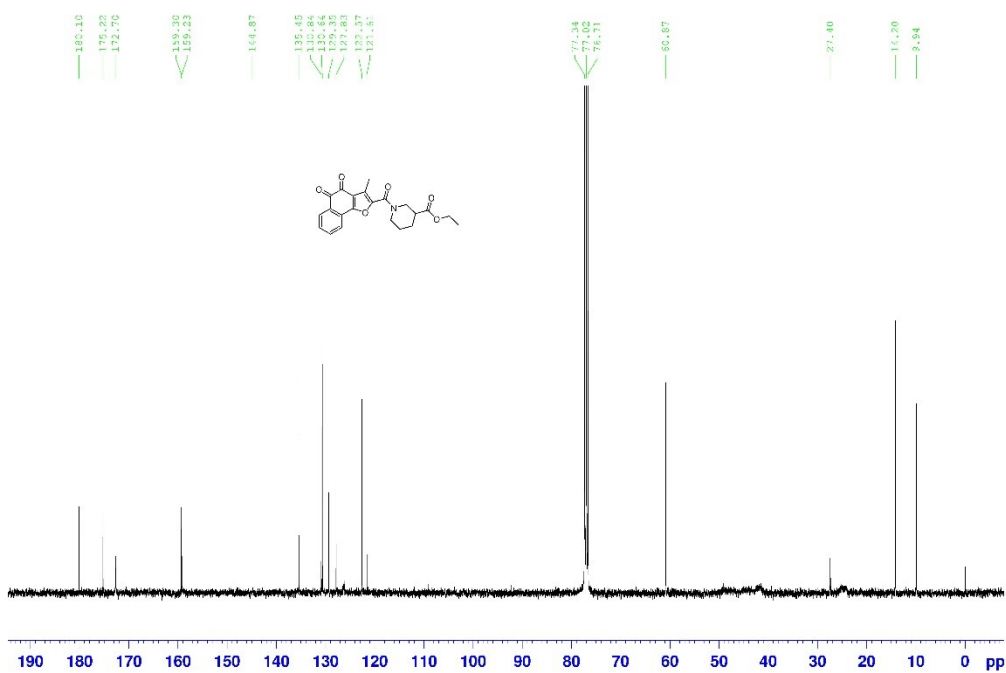

$^{13}\text{C}$  NMR spectrum of A14

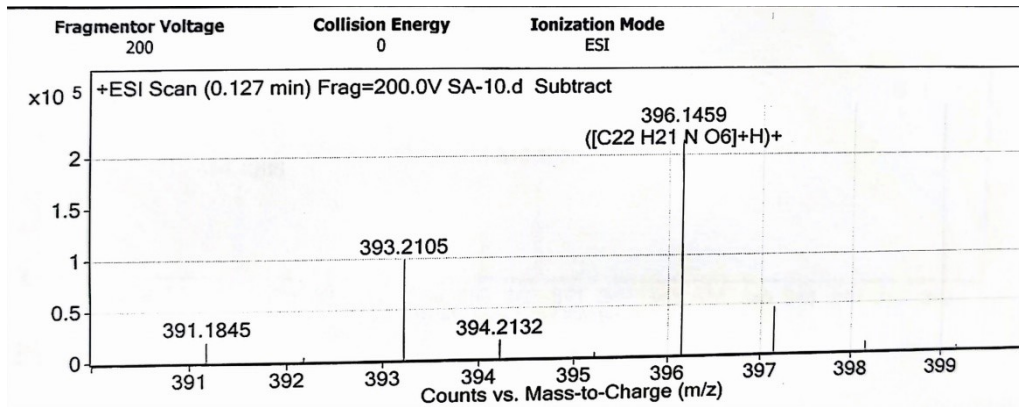

### HRMS analysis of A14

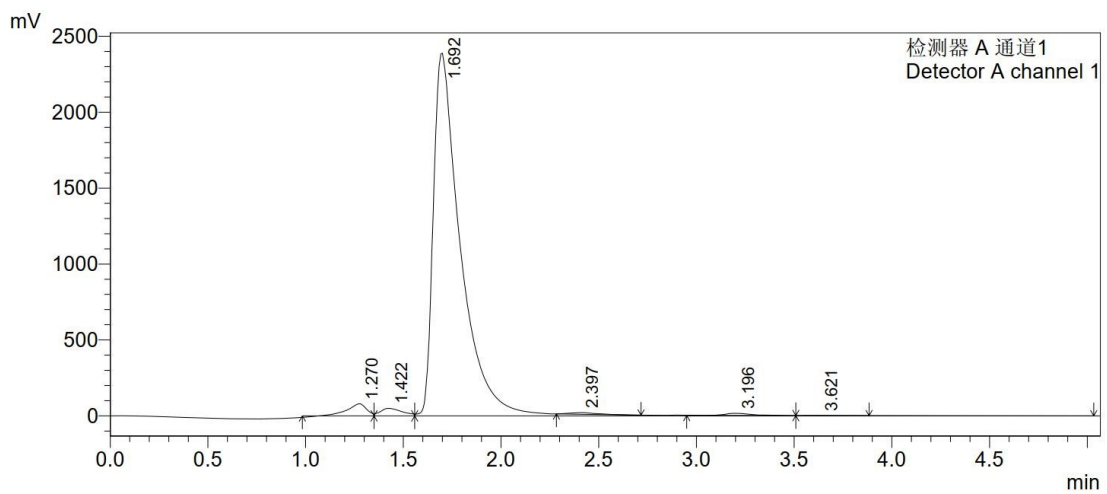



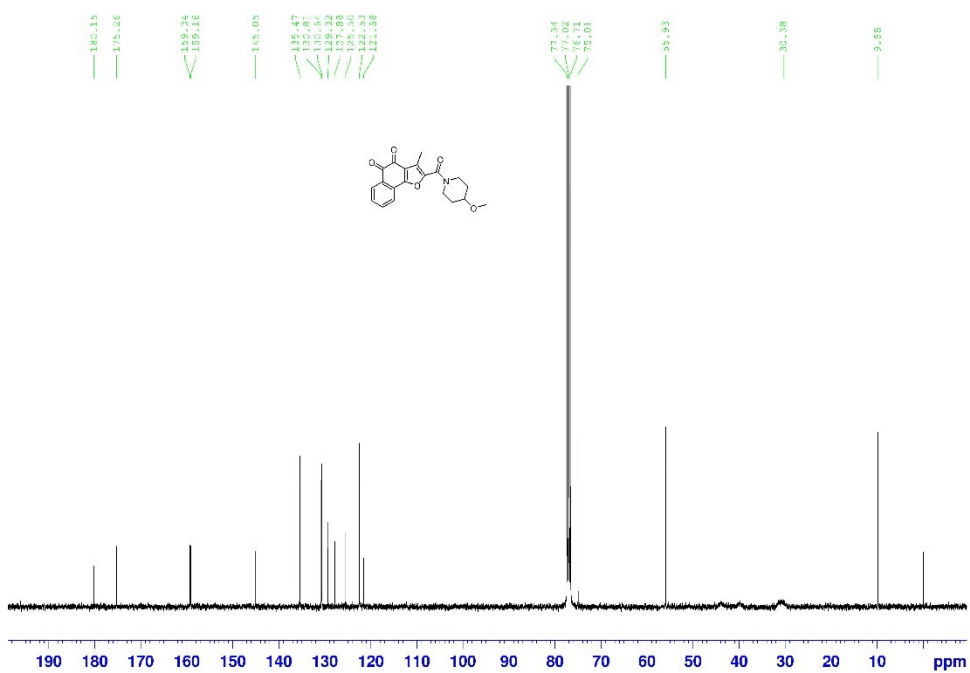

<sup>13</sup>C NMR spectrum of A15



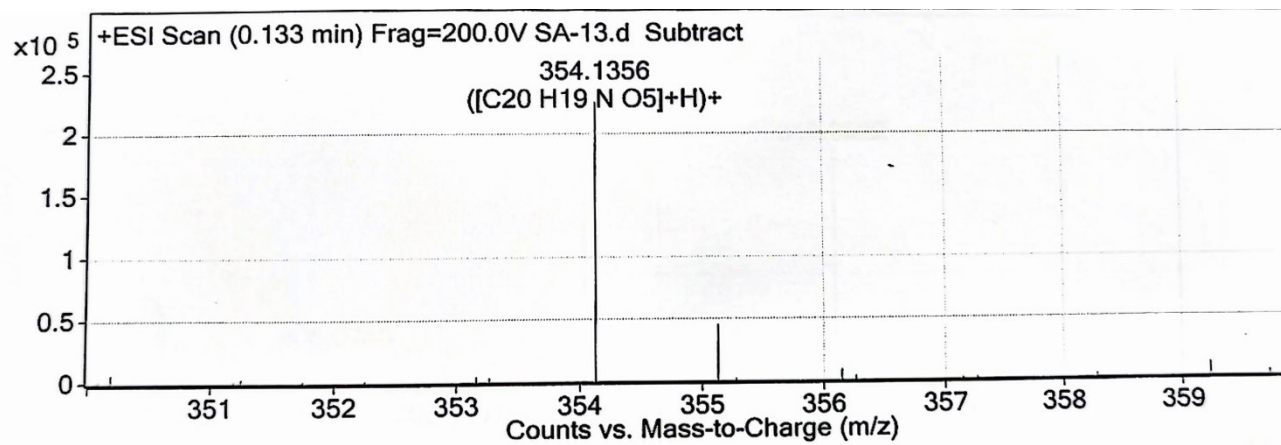

HRMS analysis of A15

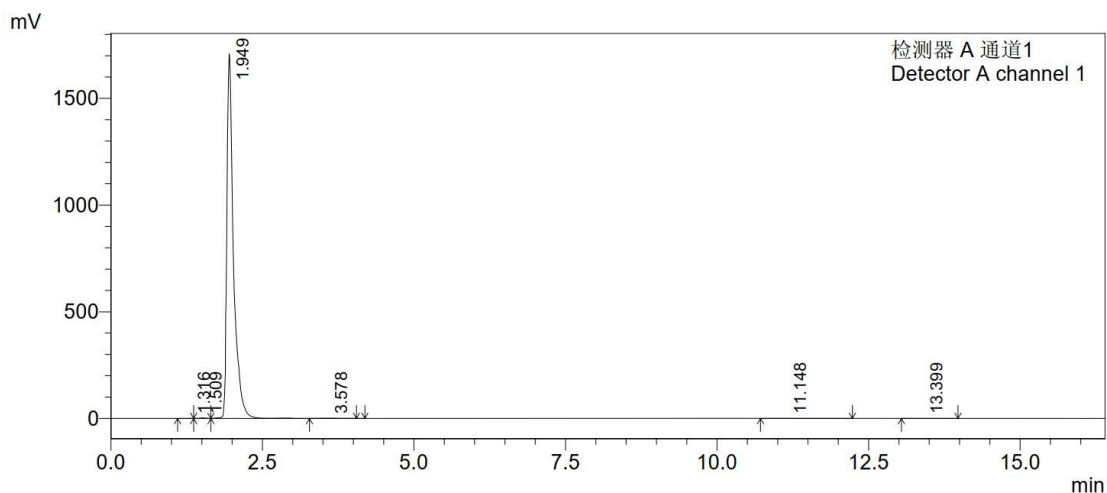

| peak  | time (min) | Area     | height  | Area %  | height % |
|-------|------------|----------|---------|---------|----------|
| 1     | 1.316      | 3232     | 458     | 0.025   | 0.027    |
| 2     | 1.509      | 21014    | 2639    | 0.161   | 0.154    |
| 3     | 1.949      | 13002170 | 1709035 | 99.484  | 99.705   |
| 4     | 3.578      | 8981     | 753     | 0.069   | 0.044    |
| 5     | 11.148     | 26573    | 899     | 0.203   | 0.052    |
| 6     | 13.399     | 7651     | 300     | 0.059   | 0.018    |
| total |            | 13069621 | 1714084 | 100.000 | 100.000  |

### HPLC analysis of A15

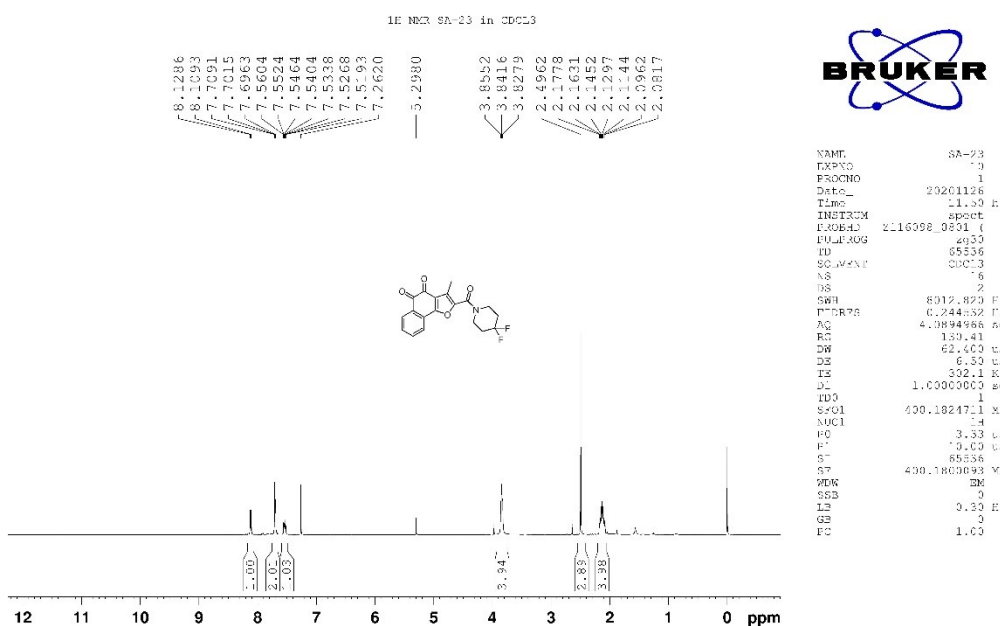

### <sup>1</sup>H NMR spectrum of A16

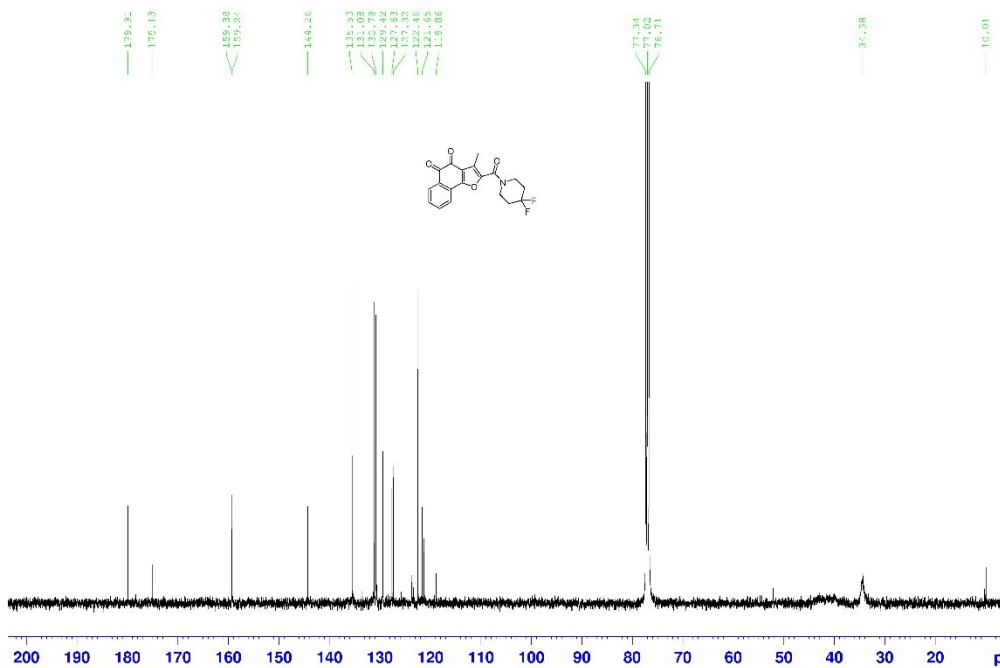

<sup>13</sup>C NMR spectrum of A16

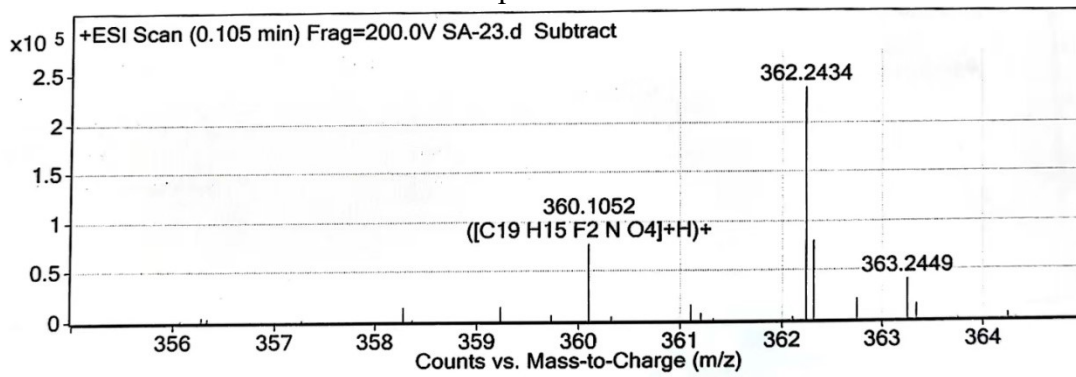

HRMS analysis of A16

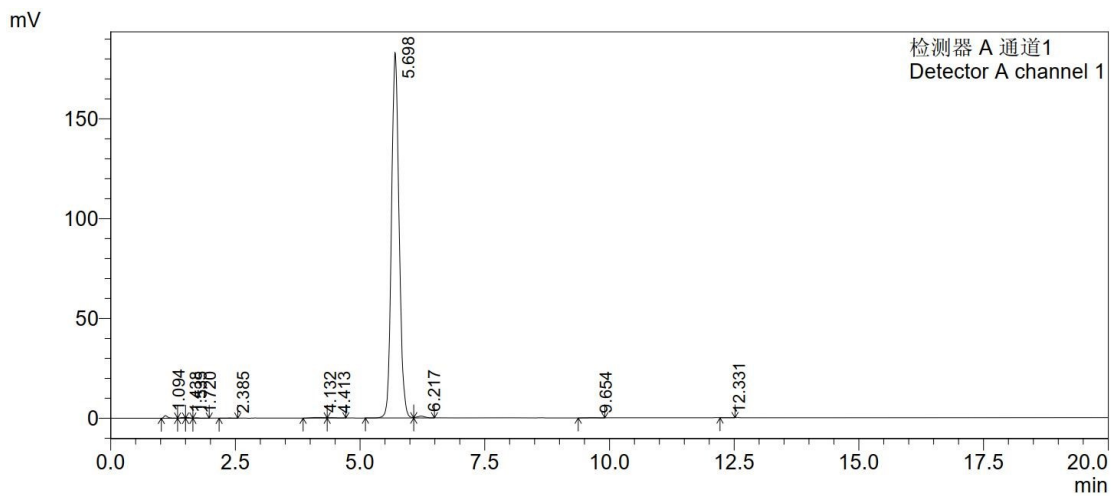

| peak  | time (min) | Area    | height | Area %  | height % |
|-------|------------|---------|--------|---------|----------|
| 1     | 1.094      | 7104    | 1294   | 0.359   | 0.691    |
| 2     | 1.438      | 2363    | 360    | 0.119   | 0.192    |
| 3     | 1.535      | 2031    | 336    | 0.103   | 0.180    |
| 4     | 1.720      | 1907    | 197    | 0.096   | 0.105    |
| 5     | 2.385      | 1283    | 94     | 0.065   | 0.050    |
| 6     | 4.132      | 5467    | 304    | 0.276   | 0.162    |
| 7     | 4.413      | 2244    | 208    | 0.113   | 0.111    |
| 8     | 5.698      | 1942698 | 183252 | 98.203  | 97.901   |
| 9     | 6.217      | 9761    | 914    | 0.493   | 0.488    |
| 10    | 9.654      | 1929    | 128    | 0.098   | 0.068    |
| 11    | 12.331     | 1459    | 94     | 0.074   | 0.050    |
| total |            | 1978245 | 187181 | 100.000 | 100.000  |

### HPLC analysis of A16

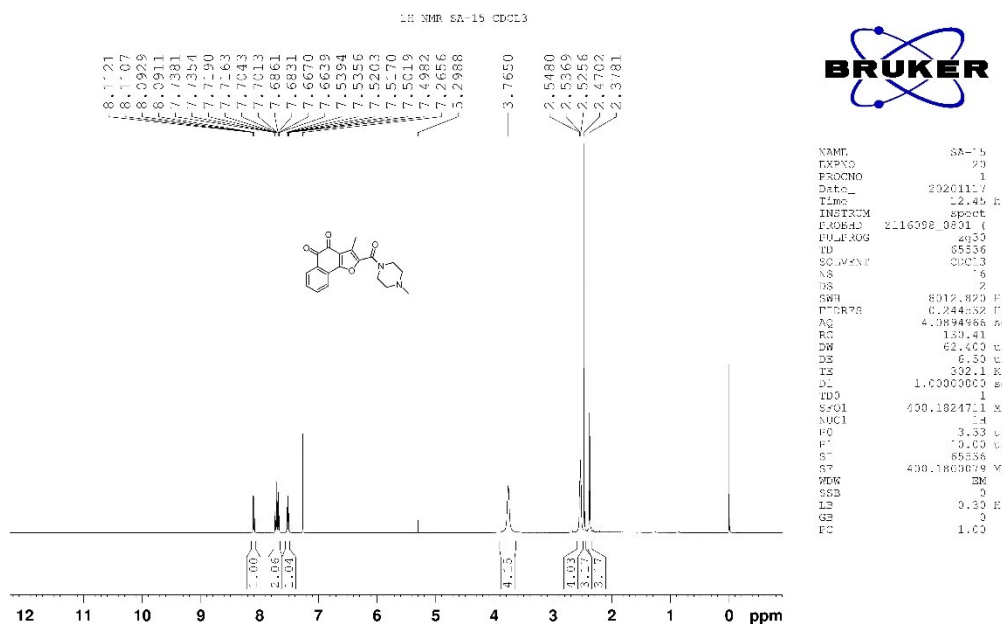

<sup>1</sup>H NMR spectrum of A17

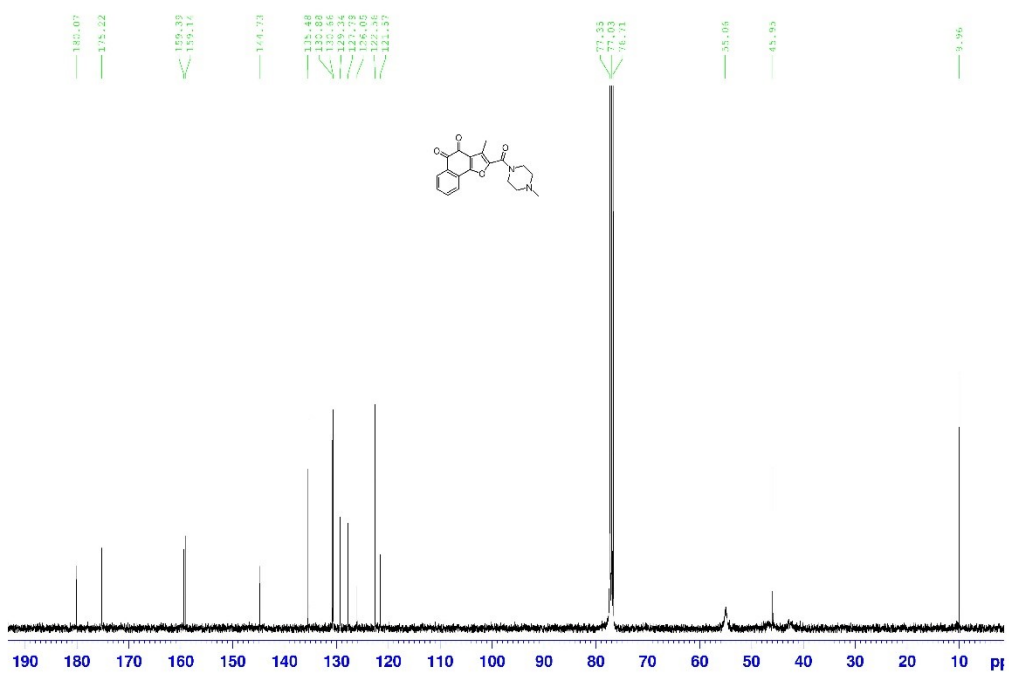

$^{13}\text{C}$  NMR spectrum of A17

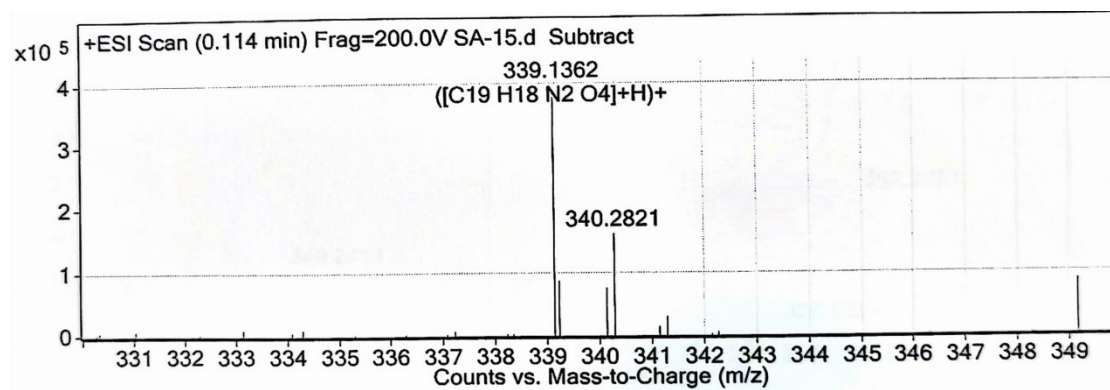

### HRMS analysis of A17

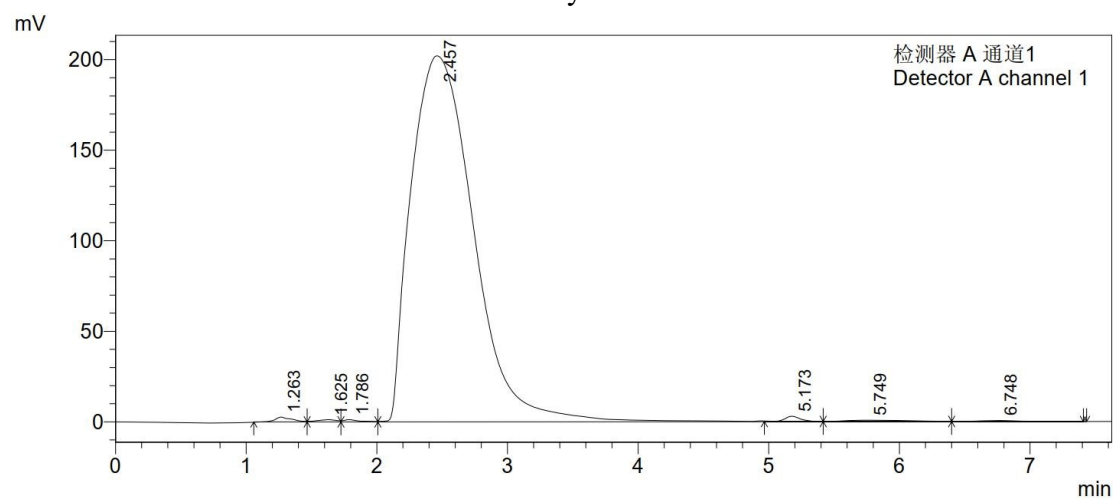

| peak  | time (min) | Area     | height  | Area %  | height % |
|-------|------------|----------|---------|---------|----------|
| 1     | 1.173      | 51582    | 6101    | 0.159   | 0.183    |
| 2     | 1.333      | 86664    | 4087    | 0.267   | 0.122    |
| 3     | 2.055      | 4240     | 456     | 0.013   | 0.014    |
| 4     | 2.336      | 5057     | 380     | 0.016   | 0.011    |
| 5     | 2.959      | 89662    | 2151    | 0.276   | 0.064    |
| 6     | 3.960      | 2763     | 281     | 0.009   | 0.008    |
| 7     | 4.959      | 31990687 | 3307616 | 98.428  | 99.120   |
| 8     | 6.274      | 20930    | 1314    | 0.064   | 0.039    |
| 9     | 6.566      | 20491    | 1166    | 0.063   | 0.035    |
| 10    | 7.176      | 220865   | 12957   | 0.680   | 0.388    |
| 11    | 8.302      | 3775     | 189     | 0.012   | 0.006    |
| 12    | 9.019      | 4833     | 295     | 0.015   | 0.009    |
| total |            | 32501549 | 3336994 | 100.000 | 100.000  |

### HPLC analysis of A17

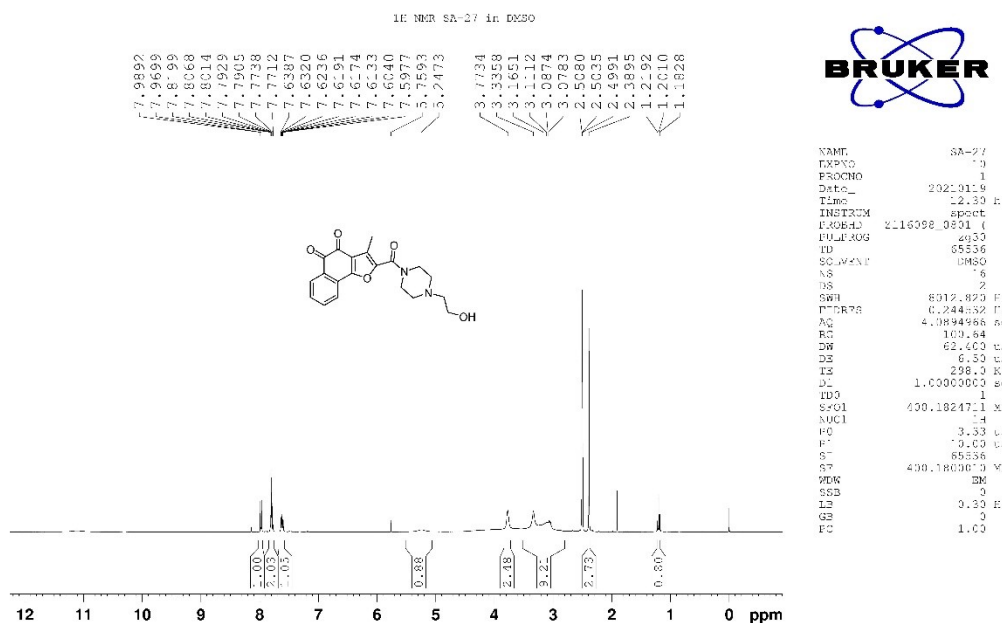

### <sup>1</sup>H NMR spectrum of A18

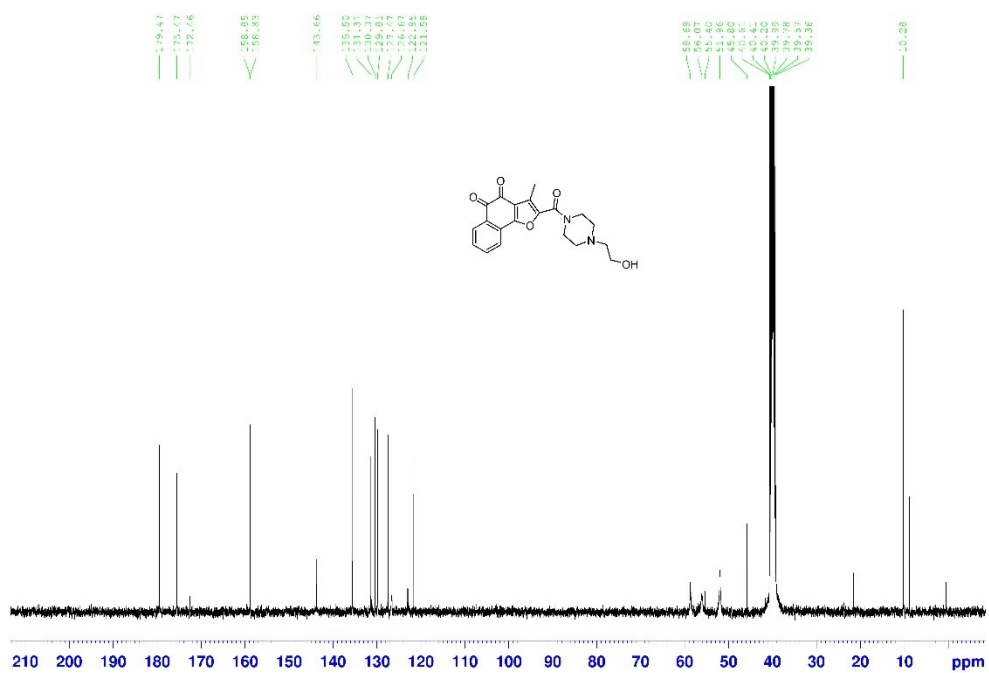

<sup>13</sup>C NMR spectrum of A18



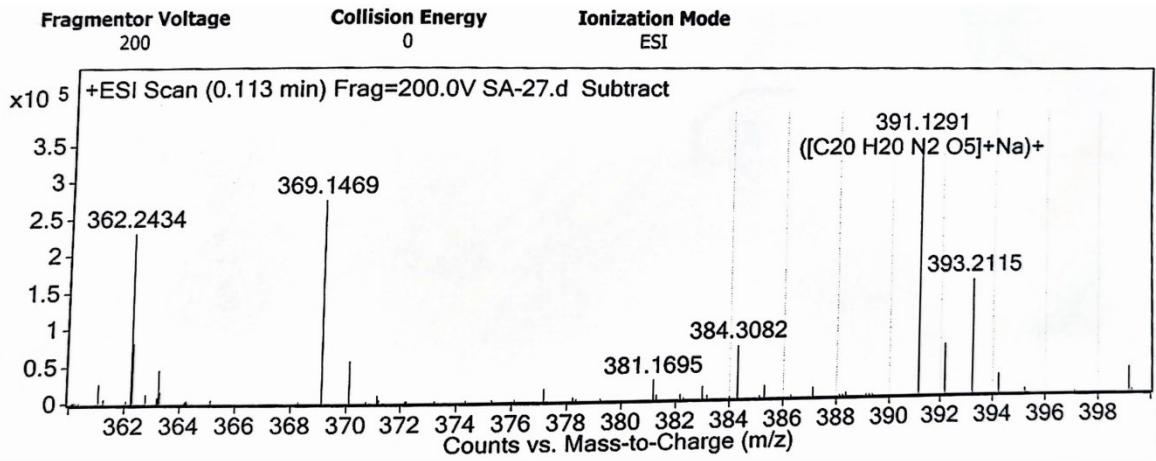

### HRMS analysis of A18

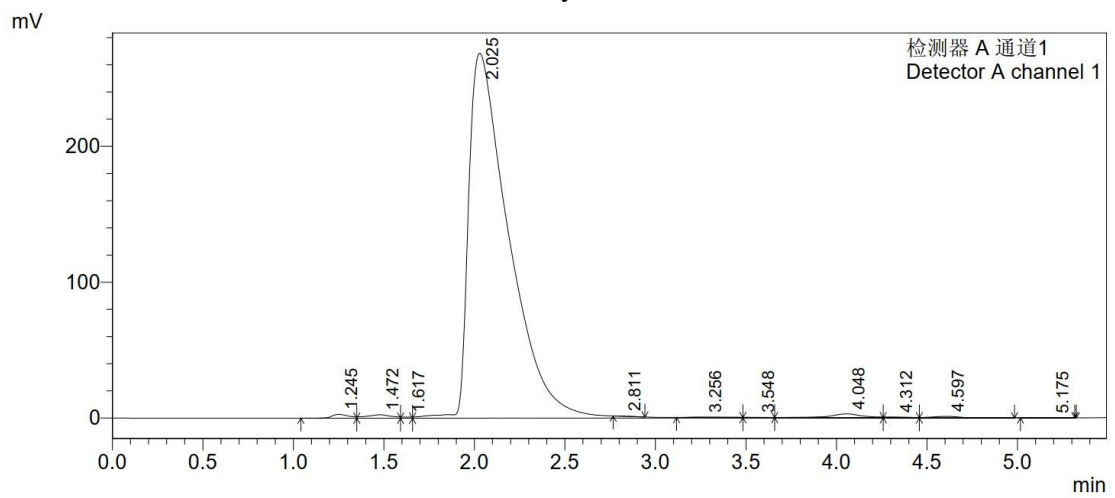

| peak  | time (min) | Area    | height | Area %  | height % |
|-------|------------|---------|--------|---------|----------|
| 1     | 1.245      | 18581   | 2827   | 0.435   | 1.008    |
| 2     | 1.472      | 23588   | 2566   | 0.552   | 0.915    |
| 3     | 1.617      | 3715    | 945    | 0.087   | 0.337    |
| 4     | 2.025      | 4161844 | 268490 | 97.455  | 95.723   |
| 5     | 2.811      | 1625    | 321    | 0.038   | 0.114    |
| 6     | 3.256      | 5151    | 444    | 0.121   | 0.158    |
| 7     | 3.548      | 1772    | 195    | 0.041   | 0.070    |
| 8     | 4.048      | 35509   | 2835   | 0.831   | 1.011    |
| 9     | 4.312      | 5712    | 581    | 0.134   | 0.207    |
| 10    | 4.597      | 11738   | 1112   | 0.275   | 0.396    |
| 11    | 5.175      | 1313    | 172    | 0.031   | 0.061    |
| total |            | 4270547 | 280488 | 100.000 | 100.000  |

### HPLC analysis of A18

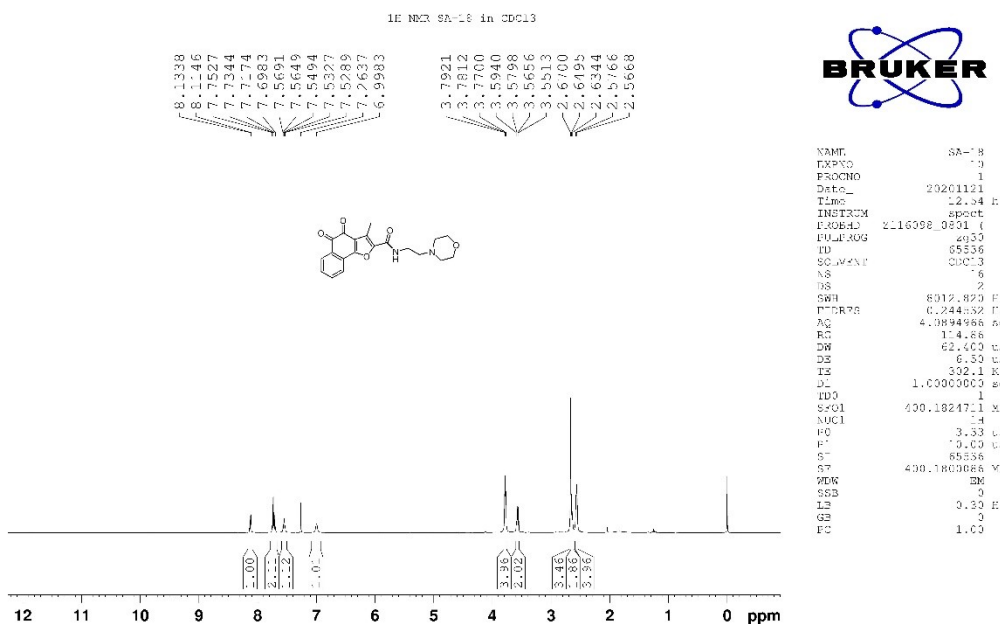

### <sup>1</sup>H NMR spectrum of A19

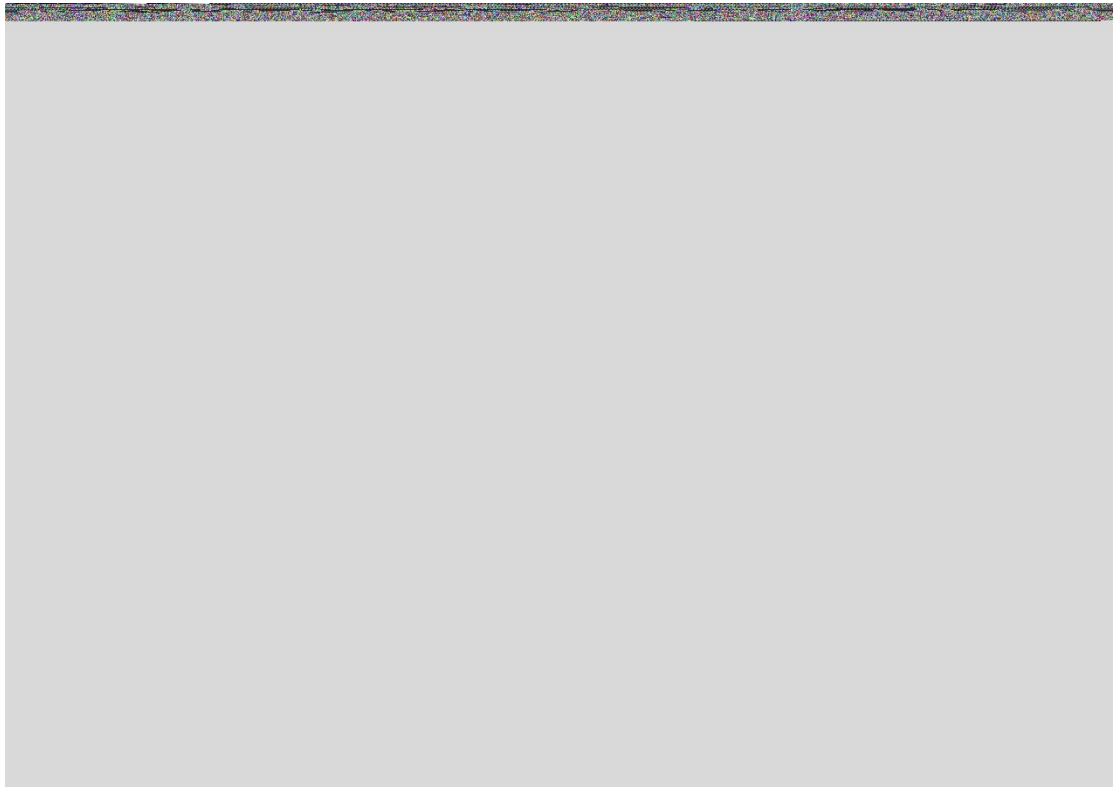

$^{13}\text{C}$  NMR spectrum of A19

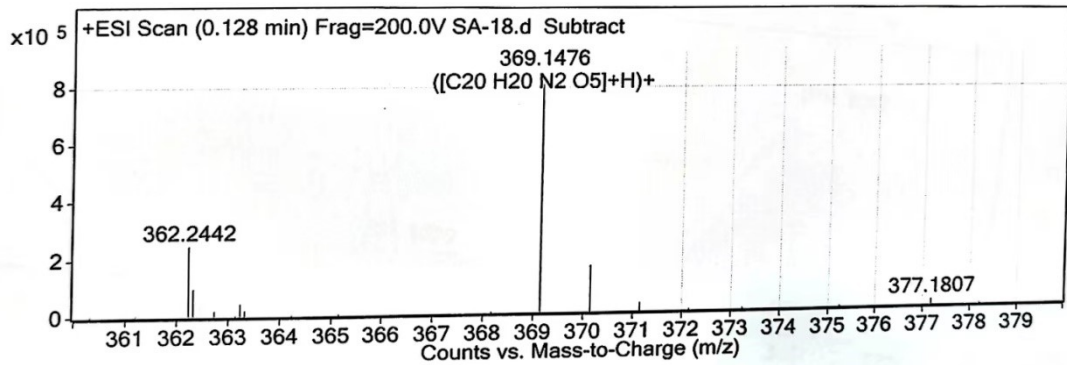

HRMS analysis of A19

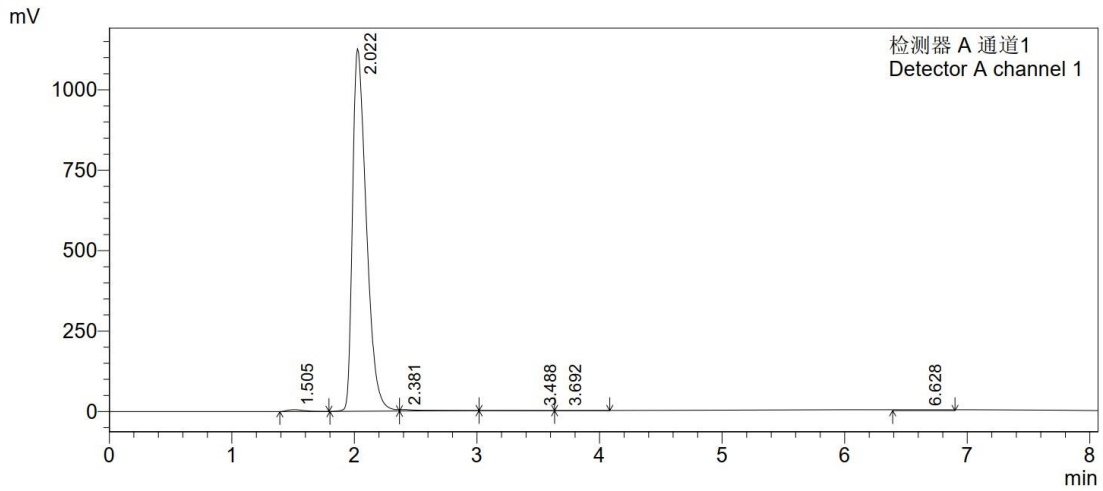

| peak  | time (min) | Area    | height  | Area %  | height % |
|-------|------------|---------|---------|---------|----------|
| 1     | 1.505      | 53265   | 5533    | 0.596   | 0.486    |
| 2     | 2.022      | 8809859 | 1127821 | 98.646  | 99.043   |
| 3     | 2.381      | 56503   | 4851    | 0.633   | 0.426    |
| 4     | 3.488      | 5950    | 236     | 0.067   | 0.021    |
| 5     | 3.692      | 4134    | 210     | 0.046   | 0.018    |
| 6     | 6.628      | 1059    | 67      | 0.012   | 0.006    |
| total |            | 8930769 | 1138720 | 100.000 | 100.000  |

### HPLC analysis of A19

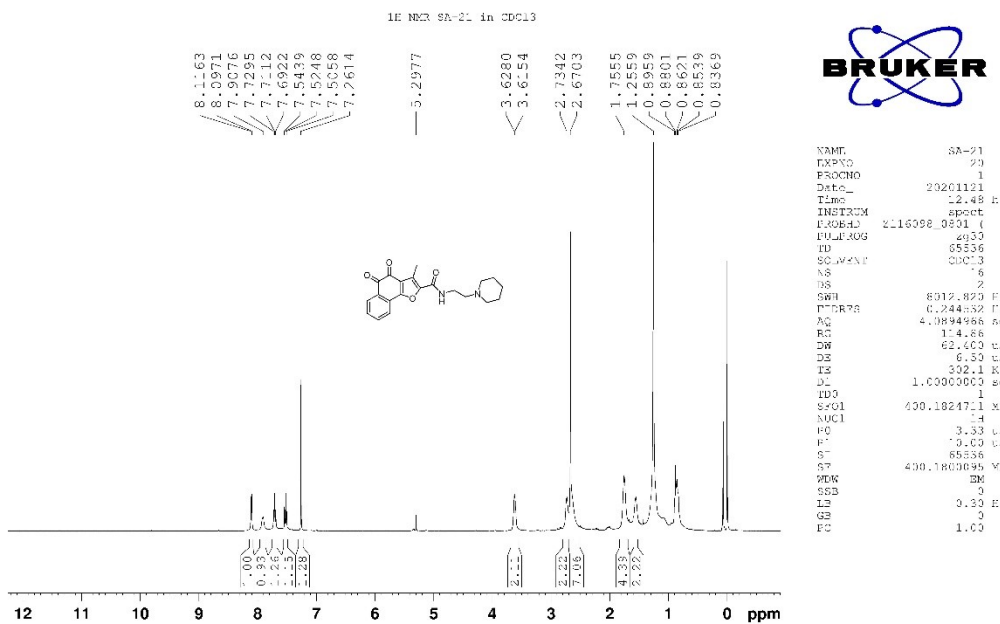

<sup>1</sup>H NMR spectrum of A20

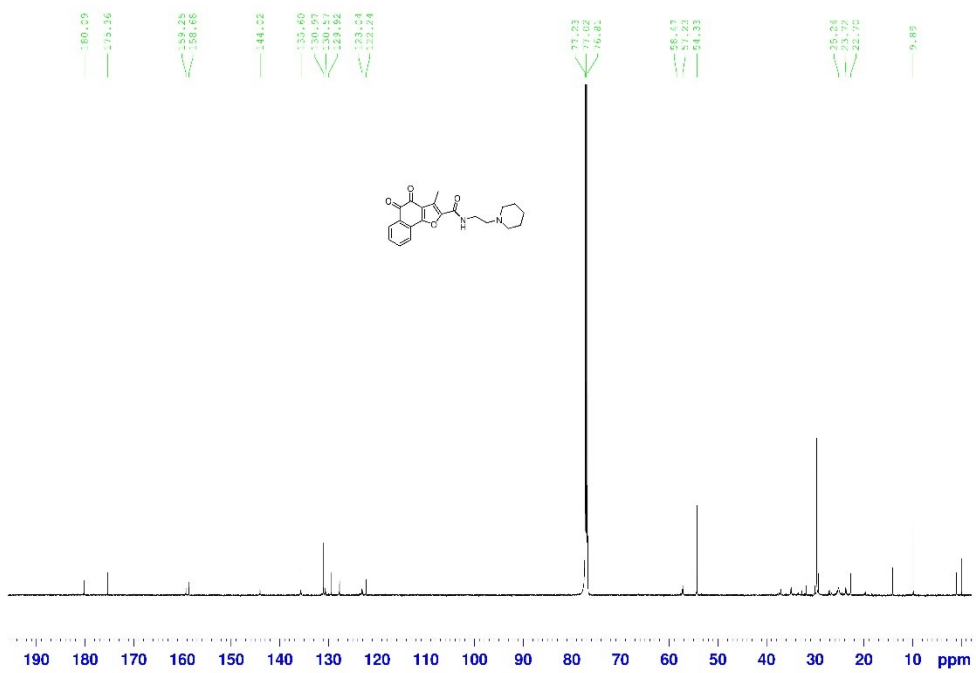

<sup>13</sup>C NMR spectrum of A20

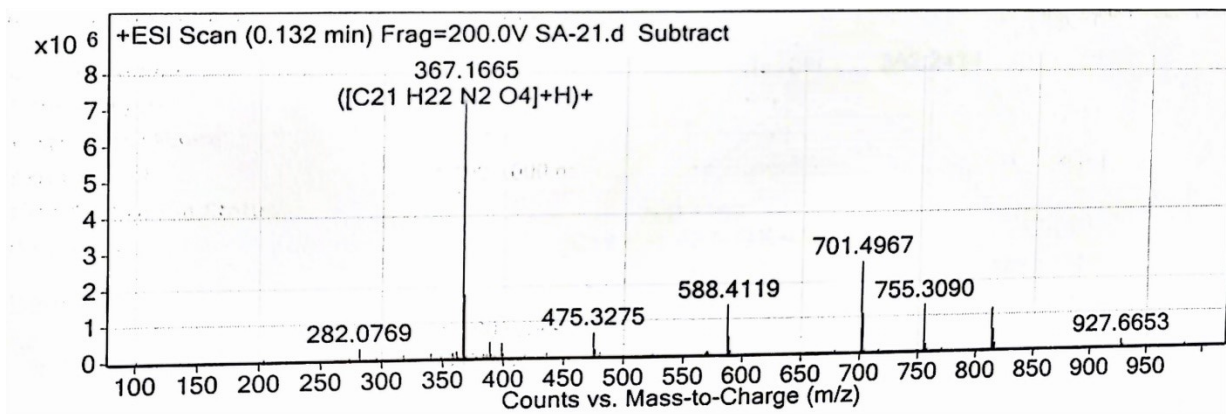

### HRMS analysis of A20

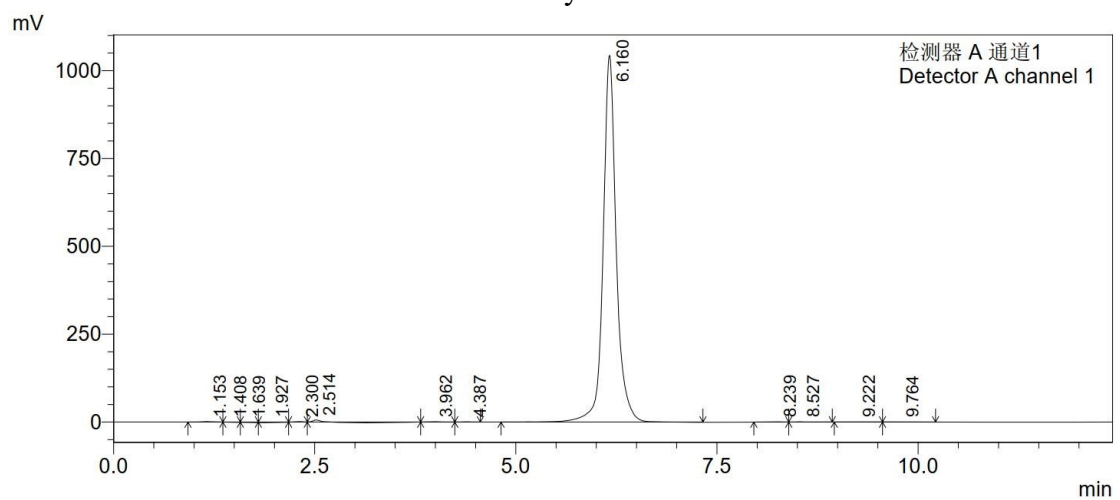

| peak  | time (min) | Area     | height  | Area %  | height % |
|-------|------------|----------|---------|---------|----------|
| 1     | 1.153      | 11107    | 1111    | 0.093   | 0.105    |
| 2     | 1.408      | 2100     | 191     | 0.018   | 0.018    |
| 3     | 1.639      | 1977     | 201     | 0.017   | 0.019    |
| 4     | 1.927      | 3052     | 220     | 0.026   | 0.021    |
| 5     | 2.300      | 7953     | 1191    | 0.067   | 0.113    |
| 6     | 2.514      | 42410    | 5790    | 0.357   | 0.549    |
| 7     | 3.962      | 7895     | 890     | 0.066   | 0.084    |
| 8     | 4.387      | 2664     | 295     | 0.022   | 0.028    |
| 9     | 6.160      | 11787924 | 1043499 | 99.203  | 98.968   |
| 10    | 8.239      | 3231     | 249     | 0.027   | 0.024    |
| 11    | 8.527      | 3594     | 234     | 0.030   | 0.022    |
| 12    | 9.222      | 5677     | 369     | 0.048   | 0.035    |
| 13    | 9.764      | 2995     | 137     | 0.025   | 0.013    |
| total |            | 11882579 | 1054377 | 100.000 | 100.000  |

### HPLC analysis of A20

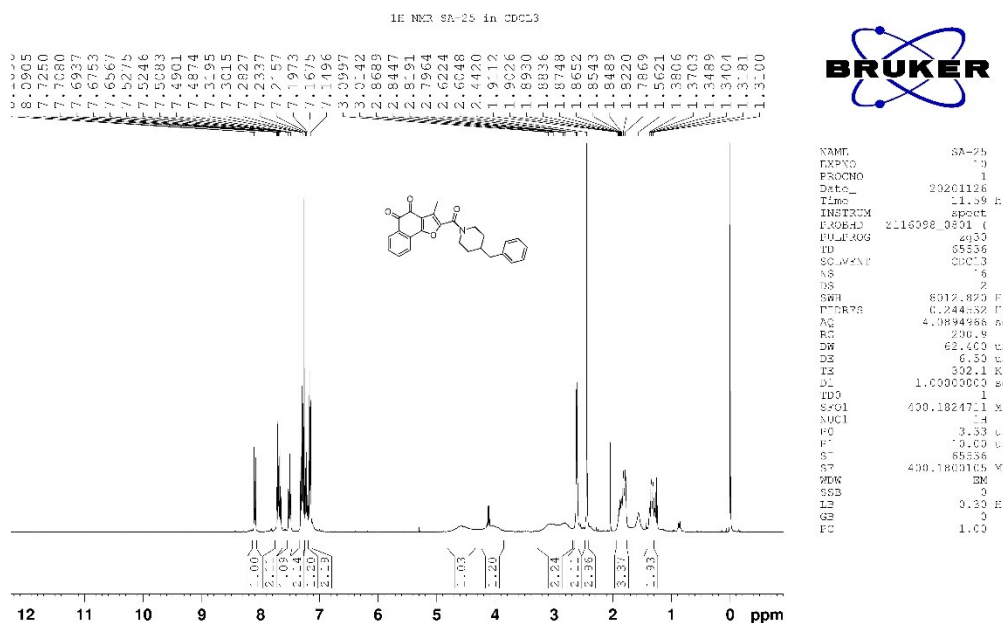

<sup>1</sup>H NMR spectrum of A21

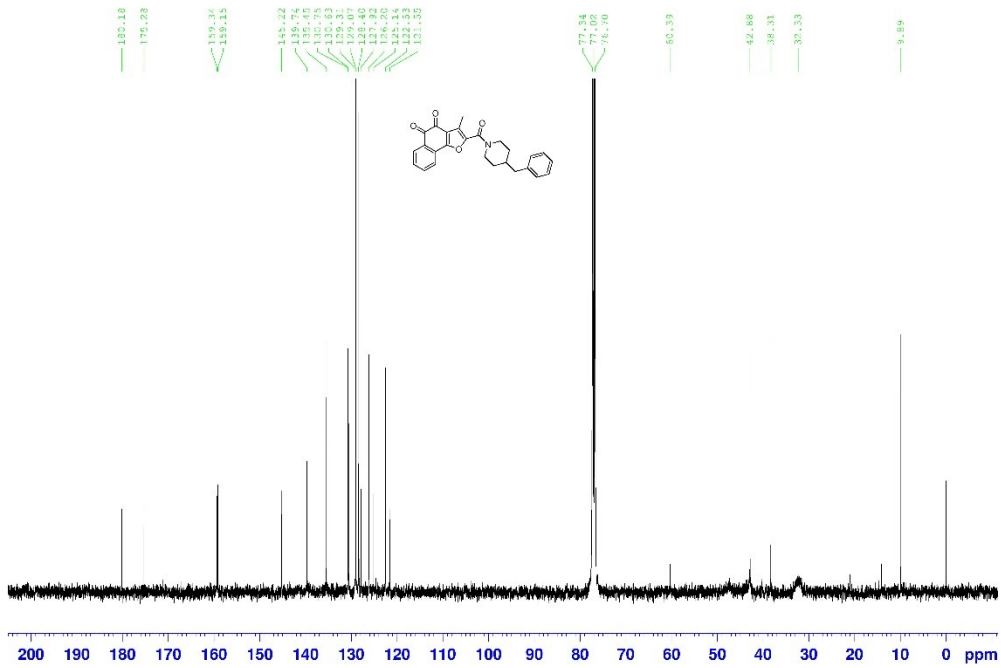

<sup>13</sup>C NMR spectrum of A21

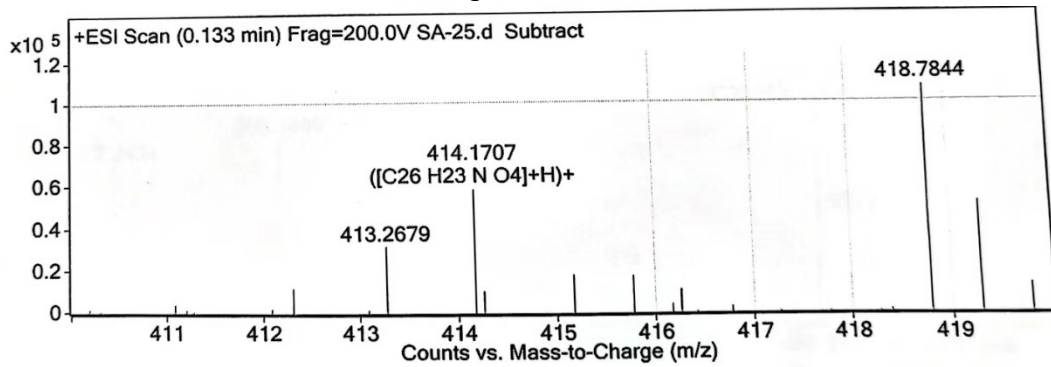

HRMS analysis of A21

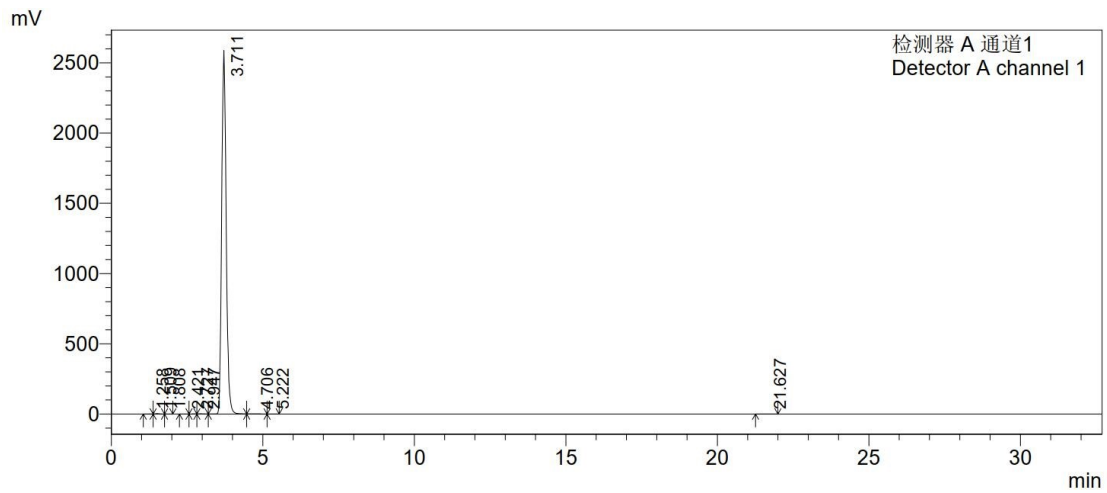



| peak  | time (min) | Area     | height  | Area %  | height % |
|-------|------------|----------|---------|---------|----------|
| 1     | 1.258      | 4681     | 525     | 0.017   | 0.020    |
| 2     | 1.509      | 25721    | 3427    | 0.095   | 0.132    |
| 3     | 1.808      | 1582     | 145     | 0.006   | 0.006    |
| 4     | 2.421      | 1214     | 98      | 0.004   | 0.004    |
| 5     | 2.727      | 8561     | 984     | 0.032   | 0.038    |
| 6     | 2.947      | 19992    | 1890    | 0.074   | 0.073    |
| 7     | 3.711      | 26900826 | 2588822 | 99.616  | 99.659   |
| 8     | 4.706      | 32911    | 1251    | 0.122   | 0.048    |
| 9     | 5.222      | 3620     | 217     | 0.013   | 0.008    |
| 10    | 21.627     | 5365     | 321     | 0.020   | 0.012    |
| total |            | 27004473 | 2597679 | 100.000 | 100.000  |

HPLC analysis of A21
